# Supplementary material
Source: PubMed Central journal article supplement (PMC2625291)

## Synthesis of Acyclic $\alpha,\beta$ -Unsaturated Ketones *via* Pd(II)-Catalyzed Intermolecular Reaction of Alkynamides and Alkenes

Norie Momiyama, Matthew W. Kanan and David R. Liu\*

*Department of Chemistry & Chemical Biology, Harvard University  
Cambridge, Massachusetts 02138*

### Supporting Information

#### **Experimental Procedures**

**General.** Reactions were carried out under an ambient atmosphere or standard grade oxygen gas in flame-dried glassware with magnetic stirring. Acetonitrile was dried through alumina.  $\text{Na}_2\text{PdCl}_4 \cdot 3\text{H}_2\text{O}$  was purchased from STREM Chemicals. Purification of reaction products was carried out by flash column chromatography using silica gel 60 (E. Merck 230-400 mesh), silica gel 60 silanized (E. Merck), and Florisil<sup>®</sup> (EM Reagent). Analytical thin layer chromatography (TLC) was performed on E. Merck precoated (0.25 mm) silica gel 60-F<sub>254</sub> plates. Visualization was accomplished with UV light and staining with phosphomolybdic acid solution in ethanol, followed by heating.

<sup>1</sup>H NMR spectra were recorded on a Varian Inova-500 (500 MHz) at ambient temperature. All NMR solvents were purchased from Cambridge Isotope Laboratories. Data are reported as follows: chemical shift in ppm from a tetramethylsilane internal standard ( $\delta$ ), multiplicity (b = broad, s = singlet, d = doublet, t = triplet, q = quartet, and m = multiplet), integration, coupling constants where appropriate (Hz), and assignment. <sup>13</sup>C NMR was recorded on a Varian Inova-500 (125 MHz) at ambient temperature, with the resonance of deuteriochloroform at 77.0 ppm used as an internal standard. Note that amide rotamers

**General Procedure for Synthesis of Pentyn- or Hexynamide.** To a solution of corresponding amine (2.0 mmol, 1 equiv) in MeCN (10 mL) was added *N*-Hydroxysuccinimide-activated 4-Pentynoic or 5-Hexynoic acid (2.4 mmol, 1.2 equiv) at room temperature. After stirring at room temperature for 1 h, the resulting solution was treated with saturated aqueous  $\text{NH}_4\text{Cl}$ . The aqueous layer was extracted with EtOAc (20 mL x 2) and the combined organic layer was washed with brine (10 mL x 2) and dried over  $\text{Na}_2\text{SO}_4$ . After filtration followed by evaporation, the crude product was purified by flash column chromatography on silica gel to provide the title compounds.

**General Procedure for Intermolecular Reaction of Alkynamides and Alkenes.** To a solution of  $\text{Na}_2\text{PdCl}_4 \cdot 3\text{H}_2\text{O}$  (15.7 mg, 0.045 mmol, 15 mol%) and  $\text{CuCl}_2 \cdot 2\text{H}_2\text{O}$  (10.2 mg, 0.060 mmol, 20 mol%) in MeCN:H<sub>2</sub>O 5:1 (1.5 mL) was added alkene (0.45 mmol, 1.5 eq). The reaction vessel was capped and placed under 1 atm of oxygen. A solution of alkyne (0.30 mmol, 1.0 eq) in MeCN:H<sub>2</sub>O 5:1 (1.5 mL) was added dropwise over 8-12 h at room temperature or 40 °C. After the dropwise addition was completed, the reaction mixture was poured into saturated aqueous  $\text{NH}_4\text{Cl}$  (5 mL). The aqueous layer was extracted with EtOAc (5 mL x 3), and then the organic layer was washed with brine (5 mL x 2). The combined organic layers were dried over  $\text{Na}_2\text{SO}_4$  and filtered, and the solvent was removed by rotary evaporation. The crude product was purified by flash

chromatography with a mobile phase consisting of a mixture of hexanes and ethyl acetate and a solid phase consisting of a layer of Florisil on top of a layer of silica gel. In all cases below, the *E* isomer was the only isomer observed by NMR analysis. Note that amide isomers in some cases cause the appearance of two very closely spaced resonances in both protein and carbon NMR spectra.

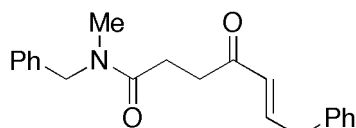

**(*E*)-*N*-Benzyl-*N*-methyl-4-oxo-7-phenylhept-5-enamide.**

TLC  $R_f$  = 0.15 (2:1 hexane: ethyl acetate);  $^1\text{H}$  NMR ( $\text{CDCl}_3$ , 500 MHz)  $\delta$  7.17-7.38 (m, 10H, Ar-*H*), 7.01-7.07 (m, 1H, CH), 6.13, 6.15 (dt, 1H,  $J$  = 15.5, 1.5 Hz, CH), 4.58, 4.59 (s, 2H,  $\text{CH}_2$ ), 3.55 (t,  $J$  = 5.0 Hz, 2H,  $\text{CH}_2$ ), 2.93, 2.96 (s, 3H,  $\text{CH}_3$ ), 2.92-2.99 (m, 2H,  $\text{CH}_2$ ), 2.68-2.71 (m, 2H,  $\text{CH}_2$ );  $^{13}\text{C}$  NMR (100 MHz,  $\text{CDCl}_3$ )  $\delta$  199.1 (C=O), 199.2 (C=O), 171.8 (NC=O), 172.0 (NC=O), 145.5 (CH), 145.6 (CH), 137.3, 136.5, 130.9 (CH), 131.1 (CH), 128.9, 128.8 (2C), 128.7 (2C), 128.5, 127.9, 127.5, 127.2, 126.7, 126.4, 53.2, 50.9, 38.9, 38.7, 34.9, 34.8, 33.9, 27.1, 26.8; MS (ESI) Exact mass calculated for  $\text{C}_{21}\text{H}_{23}\text{NO}_2$  ( $\text{M}+\text{H}$ ) $^+$ : 322.1729. Found: 322.1663.

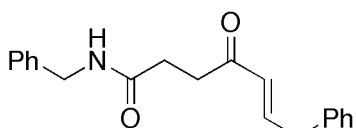

**(*E*)-*N*-Benzyl-4-oxo-7-phenylhept-5-enamide.**

TLC  $R_f$  = 0.26 (1:1 hexane: ethyl acetate);  $^1\text{H}$  NMR ( $\text{CDCl}_3$ , 500 MHz)  $\delta$  7.29-7.33 (m, 4H, Ar-*H*), 7.25-7.26 (m, 4H, Ar-*H*), 7.16-7.17 (d, 2H,  $J$  = 6.5 Hz, Ar-*H*), 6.99 (dt, 1H,  $J$  = 16.0, 6.5 Hz, CH), 6.10 (d, 1H,  $J$  = 15.5 Hz), 6.03 (br, 1H, NH), 4.41 (d, 2H,  $J$  = 6.0 Hz,  $\text{CH}_2$ ), 3.54 (d, 2H,  $J$  = 6.5 Hz,  $\text{CH}_2$ ), 2.95 (t, 2H,  $J$  = 7.0 Hz,  $\text{CH}_2$ ), 2.50 (t, 2H,  $J$  = 7.0 Hz,  $\text{CH}_2$ );  $^{13}\text{C}$  NMR (100 MHz,  $\text{CDCl}_3$ )  $\delta$  199.3, 171.9, 146.1, 138.2, 137.5, 130.7, 128.8 (2C), 128.7 (2C), 128.6 (2C), 127.7 (2C), 127.4, 126.7, 43.6, 38.7, 35.2, 29.9; MS (ESI) Exact mass calculated for  $\text{C}_{20}\text{H}_{21}\text{NO}_2$  ( $\text{M}+\text{H}$ ) $^+$ : 308.1572. Found: 308.1519.

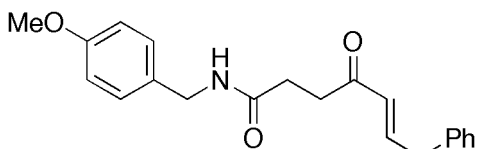

**(*E*)-*N*-(4-methoxybenzyl)-4-oxo-7-phenylhept-5-enamide.**

TLC  $R_f$  = 0.25 (1:1 hexane: ethyl acetate);  $^1\text{H}$  NMR ( $\text{CDCl}_3$ , 500 MHz)  $\delta$  7.32 (t, 2H,  $J$  = 7.5 Hz, Ar-*H*), 7.25 (t, 1H,  $J$  = 7.5 Hz, Ar-*H*), 7.19 (d, 2H,  $J$  = 9.0 Hz), 7.16 (d, 2H,  $J$  = 8.0 Hz, Ar-*H*), 7.00 (dt, 1H,  $J$  = 15.5, 7.0 Hz, CH), 6.85 (d, 2H,  $J$  = 9.0 Hz, Ar-*H*), 6.10 (dt, 1H,  $J$  = 15.5, 1.5 Hz, CH), 5.98 (br, 1H, NH), 4.34 (d, 2H,  $J$  = 6.0 Hz,  $\text{CH}_2$ ), 3.78 (s, 3H,  $\text{OCH}_3$ ), 3.54 (d, 2H,  $J$  = 7.0 Hz,  $\text{CH}_2$ ), 2.94 (t, 2H,  $J$  = 6.5 Hz,  $\text{CH}_2$ ), 2.48 (t, 2H,  $J$  = 6.5 Hz,  $\text{CH}_2$ );  $^{13}\text{C}$  NMR (100 MHz,  $\text{CDCl}_3$ )  $\delta$  199.0, 171.7, 158.9, 146.0, 137.5, 130.7, 130.3, 129.0 (2C), 128.8 (2C), 128.7 (2C), 126.7, 114.0 (2C), 55.2, 43.1, 38.7, 35.2, 30.0; MS (ESI) Exact mass calculated for  $\text{C}_{21}\text{H}_{23}\text{NO}_3$  ( $\text{M}+\text{H}$ ) $^+$ : 338.1678. Found: 338.1638.

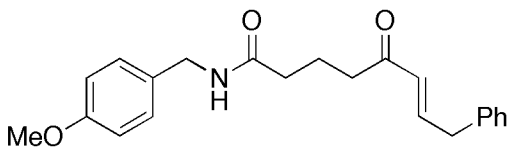

**(*E*)-*N*-(4-methoxybenzyl)-5-oxo-8-phenyloct-6-enamide.**

TLC  $R_f$  = 0.18 (1:1 hexane: ethyl acetate);  $^1\text{H}$  NMR ( $\text{CDCl}_3$ , 500 MHz)  $\delta$  7.32 (t, 2H,  $J$  = 7.5 Hz, Ar-*H*), 7.25 (t, 1H,  $J$  = 7.0 Hz, Ar-*H*), 7.19 (d, 2H, Ar-*H*,  $J$  = 9.0 Hz), 7.16 (d, 2H, Ar-*H*,  $J$  = 8.0 Hz), 6.95 (dt, 1H,  $J$  =

15.5, 7.0 Hz, *CH*), 6.84 (d, 2H,  $J = 8.5$  Hz, *Ar-H*), 6.06 (d, 1H,  $J = 16.0$  Hz, *CH*), 5.78 (br, 1H, *NH*), 4.34 (d, 2H,  $J = 5.5$  Hz,  $CH_2$ ), 3.78 (s, 3H,  $OCH_3$ ), 3.52 (d, 2H,  $J = 7.0$  Hz,  $CH_2$ ), 2.62 (t, 2H,  $J = 7.0$  Hz,  $CH_2$ ), 2.22 (t, 2H,  $J = 7.5$  Hz,  $CH_2$ ), 1.92-1.98 (m, 2H,  $CH_2$ );  $^{13}C$  NMR (100 MHz,  $CDCl_3$ )  $\delta$  199.9, 172.1, 158.9, 145.6, 137.5, 130.9, 130.4, 129.1 (2C), 128.7 (2C), 128.6 (2C), 126.7, 114.0 (2C), 55.2, 42.9, 38.7, 38.6, 35.4, 19.9; MS (ESI) Exact mass calculated for  $C_{22}H_{25}NO_3$  ( $M+H$ ) $^+$ : 352.1834. Found: 352.1852.

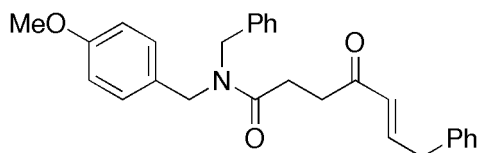

**(*E*)-*N*-Benzyl-*N*-(4-methoxybenzyl)-4-oxo-7-phenyloct-5-enamide.** TLC  $R_f = 0.16$  (2:1 hexane: ethyl acetate);  $^1H$  NMR ( $CDCl_3$ , 500 MHz)  $\delta$  7.11-7.37 (m, 10H, *Ar-H*), 7.00-7.06 (m,

1H, *CH*), 6.88 (d, 1H,  $J = 8.0$  Hz, *ArH*), 6.82 (d,

1H,  $J = 8.0$  Hz, *ArH*), 6.84 (d, 2H,  $J = 8.5$  Hz, *Ar-H*), 6.14 (dt, 1H,  $J = 16.0, 1.5$  Hz, *CH*), 4.55, 4.51, 4.47, 4.43 (s, 4H,  $CH_2$ ), 3.80, 3.78 (s, 3H,  $OCH_3$ ), 3.54 (d, 2H,  $J = 7.0$  Hz,  $CH_2$ ), 2.97 (q, 2H,  $J = 7.5$  Hz,  $CH_2$ ), 2.75 (t, 1H,  $J = 6.5$  Hz,  $CH_2$ ), 2.71 (t, 1H,  $J = 6.5$  Hz,  $CH_2$ );  $^{13}C$  NMR (100 MHz,  $CDCl_3$ )  $\delta$  199.1, 172.1, 158.9, 145.6, 137.6, 137.3, 136.4, 130.9, 129.6 (2C), 129.3, 128.8 (2C), 128.7 (2C), 128.6 (2C), 128.1, 127.9, 127.5, 127.3, 126.7 (2C), 126.5 (2C), 114.3 (2C), 113.9 (2C), 55.2, 49.6, 49.2, 48.0, 47.0, 38.8, 34.8, 27.0; MS (ESI) Exact mass calculated for  $C_{28}H_{29}NO_3$  ( $M+H$ ) $^+$ : 428.2147. Found: 428.2087.

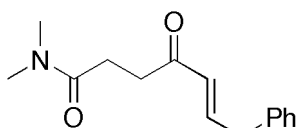

**(*E*)-*N,N*-Dimethyl-4-oxo-7-phenylhept-5-enamide.** TLC  $R_f =$

0.15 (1:2 hexane: ethyl acetate);  $^1H$  NMR ( $CDCl_3$ , 500 MHz)

$\delta$  7.32 (t, 2H,  $J = 7.5$  Hz, *Ar-H*), 7.24 (t, 1H,  $J = 7.5$  Hz, *Ar-H*),

7.18 (d, 2H,  $J = 7.0$  Hz, *Ar-H*), 7.02 (dt, 1H,  $J = 16.0, 6.5$  Hz,

*CH*), 6.14 (dt, 1H,  $J = 16.0, 1.5$  Hz, *CH*), 3.54 (dd, 2H,  $CH_2$ ,  $J = 5.5, 1.5$  Hz), 3.04 (s, 3H,  $CH_3$ ), 2.93 (s, 3H,  $CH_3$ ), 2.91 (t, 2H,  $J = 6.5$  Hz,  $CH_2$ ), 2.63 (t, 2H,  $J = 7.0$  Hz,  $CH_2$ );  $^{13}C$  NMR (100 MHz,  $CDCl_3$ )  $\delta$  199.3, 171.6, 145.6, 137.6, 131.0, 128.8 (2C), 128.7 (2C), 126.7, 38.8, 37.1, 35.5, 34.8, 27.0; MS (ESI) Exact mass calculated for  $C_{15}H_{19}NO_2$  ( $M+H$ ) $^+$ : 246.1416. Found: 246.1433.

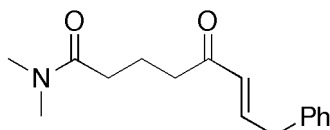

**(*E*)-*N,N*-Dimethyl-5-oxo-8-phenyloct-6-enamide.** TLC  $R_f =$

0.18 (1:2 hexane: ethyl acetate);  $^1H$  NMR ( $CDCl_3$ , 500 MHz)

$\delta$  7.32 (t, 2H,  $J = 7.5$  Hz, *Ar-H*), 7.24 (t, 1H,  $J = 7.5$  Hz, *Ar-*

*H*), 7.16 (d, 2H,  $J = 7.5$  Hz, *Ar-H*), 6.97 (dt, 1H,  $J = 16.0, 6.5$

Hz, *CH*), 6.08 (d, 1H,  $J = 15.5$  Hz, *CH*), 3.53 (d, 2H,  $CH_2$ ,  $J = 6.5$  Hz), 2.98 (s, 3H,  $CH_3$ ), 2.92 (s, 3H,  $CH_3$ ), 2.66 (t, 2H,  $J = 7.0$  Hz,  $CH_2$ ), 2.34 (t, 2H,  $J = 7.0$  Hz,  $CH_2$ ), 1.94 (t, 2H,  $J = 7.0$  Hz,  $CH_2$ );  $^{13}C$  NMR (100 MHz,  $CDCl_3$ )  $\delta$  200.2, 172.4, 145.4, 137.6, 131.0, 128.8 (2C), 128.7 (2C), 126.7, 39.0, 38.7, 37.1, 35.3, 32.2, 19.3; MS (ESI) Exact mass calculated for  $C_{16}H_{21}NO_2$  ( $M+H$ ) $^+$ : 260.1572. Found: 260.1551.

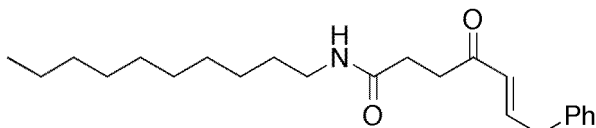

**(*E*)-*N*-Decyl-4-oxo-7-phenylhept-5-enamide.** TLC  $R_f = 0.18$  (2:1 hexane: ethyl acetate);  $^1H$  NMR ( $CDCl_3$ , 500 MHz)  $\delta$  7.32 (t, 2H,  $J = 7.0$  Hz, *Ar-H*),

7.24 (t, 1H,  $J = 7.5$  Hz, *Ar-H*), 7.16 (d, 2H,  $J = 7.0$  Hz, *Ar-H*), 6.97 (dt, 1H,  $J = 16.0, 6.5$

Hz, *CH*), 6.08 (d, 1H,  $J = 15.5$  Hz, *CH*), 3.53 (d, 2H,  $CH_2$ ,  $J = 6.5$  Hz), 2.98 (s, 3H,  $CH_3$ ), 2.92 (s, 3H,  $CH_3$ ), 2.66 (t, 2H,  $J = 7.0$  Hz,  $CH_2$ ), 2.34 (t, 2H,  $J = 7.0$  Hz,  $CH_2$ ), 1.94 (t, 2H,  $J = 7.0$  Hz,  $CH_2$ );  $^{13}C$  NMR (100 MHz,  $CDCl_3$ )  $\delta$  200.2, 172.4, 145.4, 137.6, 131.0, 128.8 (2C), 128.7 (2C), 126.7, 39.0, 38.7, 37.1, 35.3, 32.2, 19.3; MS (ESI) Exact mass calculated for  $C_{16}H_{21}NO_2$  ( $M+H$ ) $^+$ : 260.1572. Found: 260.1551.

Hz, CH), 6.10 (d, 1H,  $J = 16.0$  Hz, CH), 5.77 (br, 1H, NH), 3.53 (d, 2H,  $CH_2$ ,  $J = 6.5$  Hz), 3.20 (q, 2H,  $J = 6.5$  Hz,  $CH_2$ ), 2.92 (t, 2H,  $J = 6.5$  Hz,  $CH_2$ ), 2.45 (t, 2H,  $J = 7.0$  Hz,  $CH_2$ ), 1.46 (br, 2H,  $CH_2$ ), 1.25 (br, 14H,  $CH_2$ ), 0.88 (t, 3H,  $J = 7.0$  Hz,  $CH_3$ );  $^{13}C$  NMR (100 MHz,  $CDCl_3$ )  $\delta$  199.2, 171.9, 146.0, 137.5, 130.7, 128.8 (2C), 128.7 (2C), 126.7, 39.6, 38.7, 35.3, 31.8, 30.1, 29.5 (2C), 29.3 (2C), 29.2, 26.8, 22.6, 14.1; MS (ESI) Exact mass calculated for  $C_{23}H_{35}NO_2$  (M+H) $^+$ : 358.2668. Found: 358.2655.

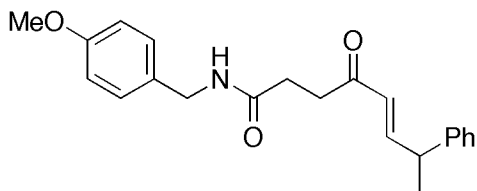

**(E)-N-(4-methoxybenzyl)-4-oxo-7-phenyloct-5-enamide.** TLC  $R_f = 0.28$  (1:1 hexane: ethyl acetate);  $^1H$  NMR ( $CDCl_3$ , 500 MHz)  $\delta$  7.31 (t, 2H,  $J = 7.0$  Hz, Ar-H), 7.23 (m, 1H, Ar-H), 7.17 (d, 4H,  $J = 7.0$  Hz, Ar-H), 7.00 (dd, 1H,  $J = 16.2$ , 6.5 Hz, CH), 6.83 (dt, 2H,  $J = 8.0$ , 1.5 Hz, Ar-H),

6.08 (dd, 1H,  $J = 16.0$ , 2.0 Hz, CH), 5.92 (br, 1H, NH), 4.33 (d, 2H,  $J = 5.5$  Hz,  $CH_2$ ), 3.78 (s, 3H,  $OCH_3$ ), 3.61 (quintet, 1H,  $J = 7.0$  Hz, CH), 2.94 (t, 2H,  $J = 6.5$  Hz,  $CH_2$ ), 2.47 (t, 2H,  $J = 6.5$  Hz,  $CH_2$ ), 1.42 (d, 3H,  $J = 7.0$  Hz,  $CH_3$ );  $^{13}C$  NMR (100 MHz,  $CDCl_3$ )  $\delta$  199.3, 171.8, 159.0, 151.3, 143.1, 130.3, 129.1 (2C), 128.8 (2C), 128.4, 127.3 (2C), 126.8, 114.0 (2C), 55.3, 43.1, 42.3, 35.3, 30.0, 20.1; MS (ESI) Exact mass calculated for  $C_{22}H_{25}NO_3$  (M+H) $^+$ : 352.1834. Found: 352.1781.

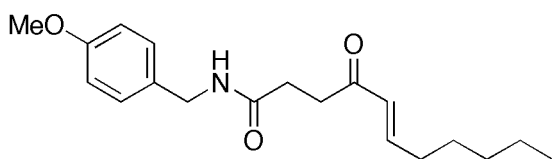

**(E)-N-(4-Methoxybenzyl)-4-oxoundec-5-enamide.** TLC  $R_f = 0.30$  (1:1 hexane: ethyl acetate);  $^1H$  NMR ( $CDCl_3$ , 500 MHz)  $\delta$  7.19 (d, 2H,  $J = 9.0$  Hz, Ar-H), 6.86-6.92 (m, 1H, CH), 6.86 (d, 2H,  $J = 9.0$  Hz, Ar-H), 6.11 (d,

1H,  $J = 14.0$  Hz, CH), 5.98 (brs, 1H, NH), 4.35 (d, 2H,  $J = 5.5$  Hz,  $CH_2$ ), 3.78 (s, 3H,  $OCH_3$ ), 2.96 (t, 2H,  $J = 7.0$  Hz,  $CH_2$ ), 2.50 (t, 2H,  $J = 6.5$  Hz,  $CH_2$ ), 2.21 (q, 2H,  $J = 6.0$  Hz,  $CH_2$ ), 1.46 (q, 2H,  $J = 7.0$  Hz,  $CH_2$ ), 1.29-1.34 (m, 4H,  $CH_2$ ), 0.897 (t, 3H,  $J = 7.0$  Hz,  $CH_3$ );  $^{13}C$  NMR (100 MHz,  $CDCl_3$ )  $\delta$  199.2, 171.8, 158.9, 148.4, 130.3, 130.0, 129.0 (2C), 114.0 (2C), 55.3, 43.1, 35.1, 32.5, 31.3, 30.1, 27.7, 22.4, 13.9; MS (ESI) Exact mass calculated for  $C_{19}H_{27}NO_3$  (M+H) $^+$ : 318.1991. Found: 318.1960.

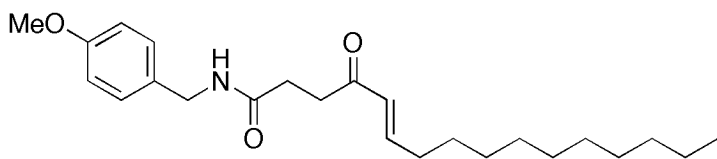

**(E)-N-(4-Methoxybenzyl)-4-oxohexadec-5-enamide.** TLC  $R_f = 0.20$  (2:1 hexane: ethyl acetate);  $^1H$  NMR ( $CDCl_3$ , 500 MHz)  $\delta$  7.19 (d, 2H,  $J = 8.5$  Hz,

Ar-H), 6.84-6.92 (m, 3H, CH, Ar-H), 6.11 (d, 1H,  $J = 16.0$  Hz, CH), 5.96 (brs, 1H, NH), 4.35 (d, 2H,  $J = 6.0$  Hz,  $CH_2$ ), 3.79 (s, 3H,  $OCH_3$ ), 2.95 (t, 2H,  $J = 7.0$  Hz,  $CH_2$ ), 2.50 (t, 2H,  $J = 6.5$  Hz,  $CH_2$ ), 2.21 (q, 2H,  $J = 7.0$  Hz,  $CH_2$ ), 1.44-1.47 (q, 2H,  $J = 7.0$  Hz,  $CH_2$ ), 1.26 (br, 14H,  $CH_2$ ), 0.882 (t, 3H,  $J = 6.5$  Hz,  $CH_3$ );  $^{13}C$  NMR (100 MHz,  $CDCl_3$ )  $\delta$  199.2, 171.9, 159.0, 148.4, 130.3, 130.0, 129.0 (2C), 114.0 (2C), 55.3, 43.1, 35.1, 32.5, 32.0, 30.3, 29.9, 29.6, 29.5 (2C), 29.4 (2C), 28.0, 22.7, 14.1; MS (ESI) Exact mass calculated for  $C_{24}H_{37}NO_3$  (M+H) $^+$ : 388.2773. Found: 388.2726.

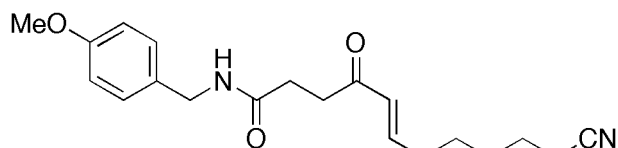

**(E)-11-Cyano-N-(4-methoxybenzyl)-4-oxoundec-5-enamide.** TLC  $R_f$  = 0.18 (40:1  $\text{CH}_2\text{Cl}_2$ : MeOH);  $^1\text{H}$  NMR ( $\text{CDCl}_3$ , 500 MHz)  $\delta$  7.21 (d, 2H,  $J$  = 9.0 Hz, Ar- $H$ ), 6.83-6.89 (m, 3H, CH,

Ar- $H$ ), 6.13 (d, 1H,  $J$  = 16.0 Hz, CH), 5.94 (brs, 1H, NH), 4.35 (d, 2H,  $J$  = 5.5 Hz,  $\text{CH}_2$ ), 3.80 (s, 3H,  $\text{OCH}_3$ ), 2.95 (t, 2H,  $J$  = 7.0 Hz,  $\text{CH}_2$ ), 2.51 (t, 2H,  $J$  = 6.5 Hz,  $\text{CH}_2$ ), 2.36 (t, 2H,  $J$  = 7.0 Hz,  $\text{CH}_2$ ), 2.25 (q, 2H,  $J$  = 7.0 Hz,  $\text{CH}_2$ ), 1.47-1.53 (m, 2H,  $\text{CH}_2$ ), 1.61 (m, 2H,  $\text{CH}_2$ ), 1.65-1.71 (m, 2H,  $\text{CH}_2$ );  $^{13}\text{C}$  NMR (100 MHz,  $\text{CDCl}_3$ )  $\delta$  199.0, 171.8, 158.9, 147.0, 130.4, 130.3, 129.0 (2C), 119.5, 114.0 (2C), 55.3, 43.1, 35.1, 32.0, 30.0, 28.1, 27.2, 25.1, 17.0; MS (ESI) Exact mass calculated for  $\text{C}_{20}\text{H}_{26}\text{N}_2\text{O}_3$  ( $\text{M}+\text{H}$ ) $^+$ : 343.1943. Found: 343.1904.

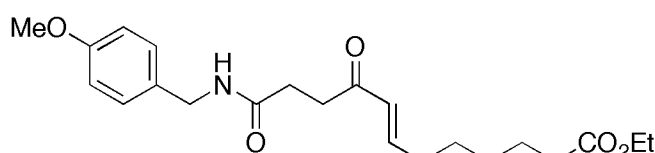

**(E)-Ethy-12-(4-methoxybenzyl amino)-9,12-dioxododec-7-enoate.** TLC  $R_f$  = 0.18 (1:1 hexane: ethyl acetate);  $^1\text{H}$  NMR ( $\text{CDCl}_3$ , 500 MHz)  $\delta$  7.20 (d, 2H,  $J$  = 9.0 Hz, Ar-

$H$ ), 6.84-6.90 (m, 3H, CH, Ar- $H$ ), 6.13 (d, 1H,  $J$  = 16.0 Hz, CH), 5.99 (brs, 1H, NH), 4.35 (d, 2H,  $J$  = 5.5 Hz,  $\text{CH}_2$ ), 4.10-4.15 (m, 2H,  $\text{CH}_2$ ), 3.80 (s, 3H,  $\text{OCH}_3$ ), 2.95 (t, 2H,  $J$  = 6.5 Hz,  $\text{CH}_2$ ), 2.44-2.54 (m, 4H,  $\text{CH}_2$ ), 2.28-2.35 (m, 2H,  $\text{CH}_2$ ), 1.60-1.67 (m, 2H,  $\text{CH}_2$ ), 1.42-1.54 (m, 2H,  $\text{CH}_2$ ), 1.32-1.40 (m, 2H,  $\text{CH}_2$ ), 1.23-1.28 (m, 3H,  $\text{CH}_3$ );  $^{13}\text{C}$  NMR (100 MHz,  $\text{CDCl}_3$ )  $\delta$  199.1, 173.6, 171.8, 158.9, 147.8, 130.1, 129.0 (2C), 119.5, 114.0 (2C), 77.0, 60.2, 55.2, 43.0, 35.1, 34.1, 32.2, 30.0, 28.6, 27.6, 24.6, 14.2; MS (ESI) Exact mass calculated for  $\text{C}_{22}\text{H}_{31}\text{NO}_5$  ( $\text{M}+\text{H}$ ) $^+$ : 390.2202. Found: 390.2221.

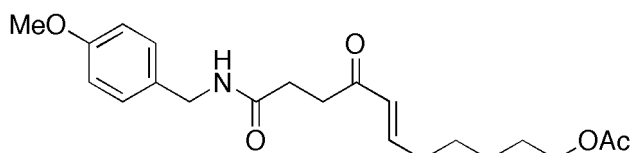

**(E)-Ethy-11-(4-methoxybenzyl amino)-8,11-dioxododec-6-enyl acetate.** TLC  $R_f$  = 0.13 (1:1 hexane: ethyl acetate);  $^1\text{H}$  NMR ( $\text{CDCl}_3$ , 500 MHz)  $\delta$  7.19 (d, 2H,  $J$  = 9.0 Hz, Ar- $H$ ),

6.85-6.89 (m, 3H, CH, Ar- $H$ ), 6.13 (d, 1H,  $J$  = 16.0 Hz, CH), 6.02 (brs, 1H, NH), 4.35 (d, 2H,  $J$  = 5.5 Hz,  $\text{CH}_2$ ), 4.06 (t, 2H,  $J$  = 6.5 Hz,  $\text{CH}_2$ ), 3.79 (s, 3H,  $\text{OCH}_3$ ), 2.95 (t, 2H,  $J$  = 7.0 Hz,  $\text{CH}_2$ ), 2.50 (t, 2H,  $J$  = 7.0 Hz,  $\text{CH}_2$ ), 2.23 (q, 2H,  $J$  = 7.5 Hz,  $\text{CH}_2$ ), 2.05 (s, 3H,  $\text{CH}_3$ ), 1.61-1.67 (m, 2H,  $\text{CH}_2$ ), 1.47-1.53 (m, 2H,  $\text{CH}_2$ ), 1.37-1.42 (m, 2H,  $\text{CH}_2$ );  $^{13}\text{C}$  NMR (100 MHz,  $\text{CDCl}_3$ )  $\delta$  199.1, 171.8, 171.1, 158.9, 147.6, 130.1, 130.3, 129.0 (2C), 113.9 (2C), 64.2, 55.2, 43.0, 35.0, 32.2, 29.9, 28.3, 27.6, 25.5, 20.9; MS (ESI) Exact mass calculated for  $\text{C}_{21}\text{H}_{29}\text{NO}_5$  ( $\text{M}+\text{H}$ ) $^+$ : 376.2046. Found: 376.2069.

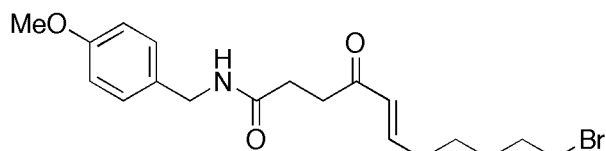

**(E)-11-Bromo-N-(4-methoxybenzyl)-4-oxoundec-5-enamide.** TLC  $R_f$  = 0.18 (1:1 hexane: ethyl acetate);  $^1\text{H}$  NMR ( $\text{CDCl}_3$ , 500 MHz)  $\delta$  7.19 (d, 2H,  $J$  = 8.5 Hz, Ar- $H$ ), 6.84-6.90 (m, 3H, CH, Ar-

$H$ ), 6.12 (d, 1H,  $J$  = 16.5 Hz, CH), 5.95 (brs, 1H, NH), 4.35 (d, 2H,  $J$  = 6.0 Hz,  $\text{CH}_2$ ), 3.80 (s, 3H,  $\text{OCH}_3$ ), 3.41 (t, 2H,  $J$  = 7.0 Hz,  $\text{CH}_2$ ), 2.96 (t, 2H,  $J$  = 6.5 Hz,  $\text{CH}_2$ ), 2.51 (t,

2H,  $J = 6.5$  Hz,  $\text{CH}_2$ ), 2.24 (q, 2H,  $J = 6.5$  Hz,  $\text{CH}_2$ ), 1.86-1.89 (m, 2H,  $\text{CH}_2$ ), 1.48-1.51 (m, 4H,  $\text{CH}_2$ );  $^{13}\text{C}$  NMR (100 MHz,  $\text{CDCl}_3$ )  $\delta$  199.1, 171.8, 158.9, 147.5, 130.3, 130.2, 129.0 (2C), 114.0 (2C), 55.2, 43.1, 35.1, 33.5, 32.4, 32.2, 30.1, 27.7, 27.2; MS (ESI) Exact mass calculated for  $\text{C}_{19}\text{H}_{26}\text{BrNO}_3$  ( $\text{M}+\text{H}$ ) $^+$ : 396.1096. Found: 396.1076.

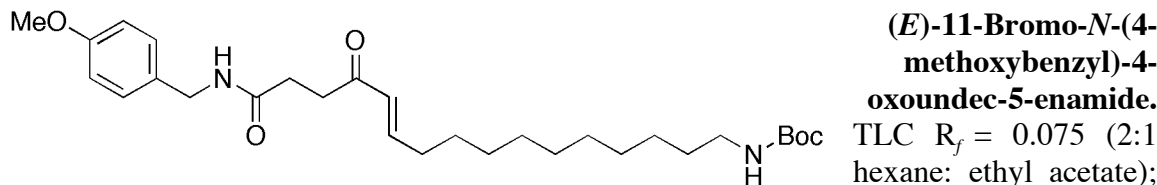

$^1\text{H}$  NMR ( $\text{CDCl}_3$ , 500 MHz)  $\delta$  7.19 (d, 2H,  $J = 9.0$  Hz, Ar- $H$ ), 6.84-6.92 (m, 3H, CH, Ar- $H$ ), 6.10 (d, 1H,  $J = 15.0$  Hz, CH), 5.97 (brs, 1H, NH), 4.51 (brs, 1H, NH), 4.35 (d, 2H,  $J = 6.0$  Hz,  $\text{CH}_2$ ), 3.80 (s, 3H,  $\text{OCH}_3$ ), 3.10 (br, 2H,  $\text{CH}_2$ ), 2.96 (t, 2H,  $J = 6.5$  Hz,  $\text{CH}_2$ ), 2.51 (t, 2H,  $J = 6.5$  Hz,  $\text{CH}_2$ ), 2.21 (q, 2H,  $J = 6.5$  Hz,  $\text{CH}_2$ ), 1.60-1.62 (br, 2H,  $\text{CH}_2$ ), 1.44 (brs, 9H,  $\text{C}(\text{CH}_3)_3$ ), 1.28 (brs, 14H,  $\text{CH}_2$ );  $^{13}\text{C}$  NMR (100 MHz,  $\text{CDCl}_3$ )  $\delta$  199.2, 171.9, 158.9, 148.3, 130.4, 130.0, 129.0 (2C), 114.0 (2C), 78.1, 55.2, 43.1, 40.6, 35.0, 32.5, 30.1, 30.0, 29.4, 29.3 (2C), 29.2 (2C), 29.1, 28.4 (3C), 28.0, 26.8; MS (ESI) Exact mass calculated for  $\text{C}_{29}\text{H}_{46}\text{NO}_5$  ( $\text{M}+\text{H}$ ) $^+$ : 503.3407. Found: 503.2653.

### $^{17}\text{O}$ NMR spectrum

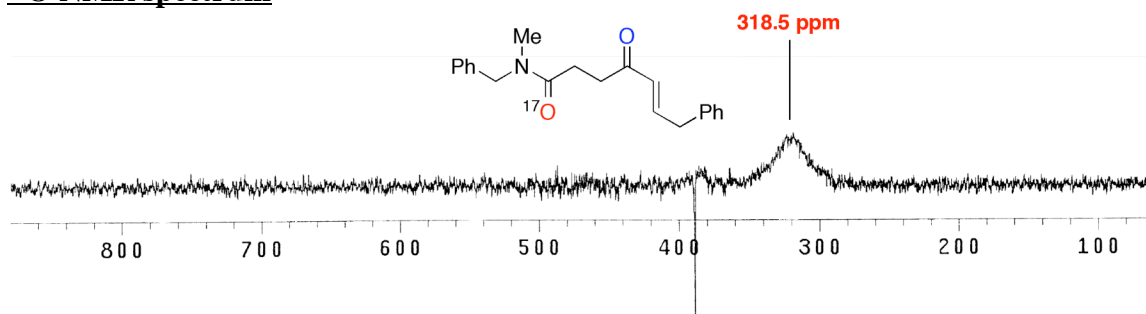

$^1\text{H}$  and  $^{13}\text{C}$  NMR spectrum for the above compounds appear on the following pages.

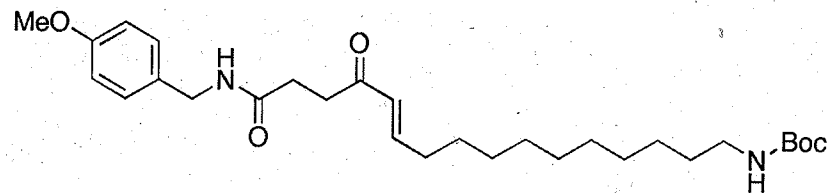

Pulse 79.4 degrees  
 Acq. time 2.048 sec  
 Width 8000.0 Hz  
 16 repetitions  
 OBSERVE H1, 499.6156699 MHz  
 DATA PROCESSING  
 Line broadening 0.1 Hz  
 FT size 32768  
 Total time 0 min, 40 sec

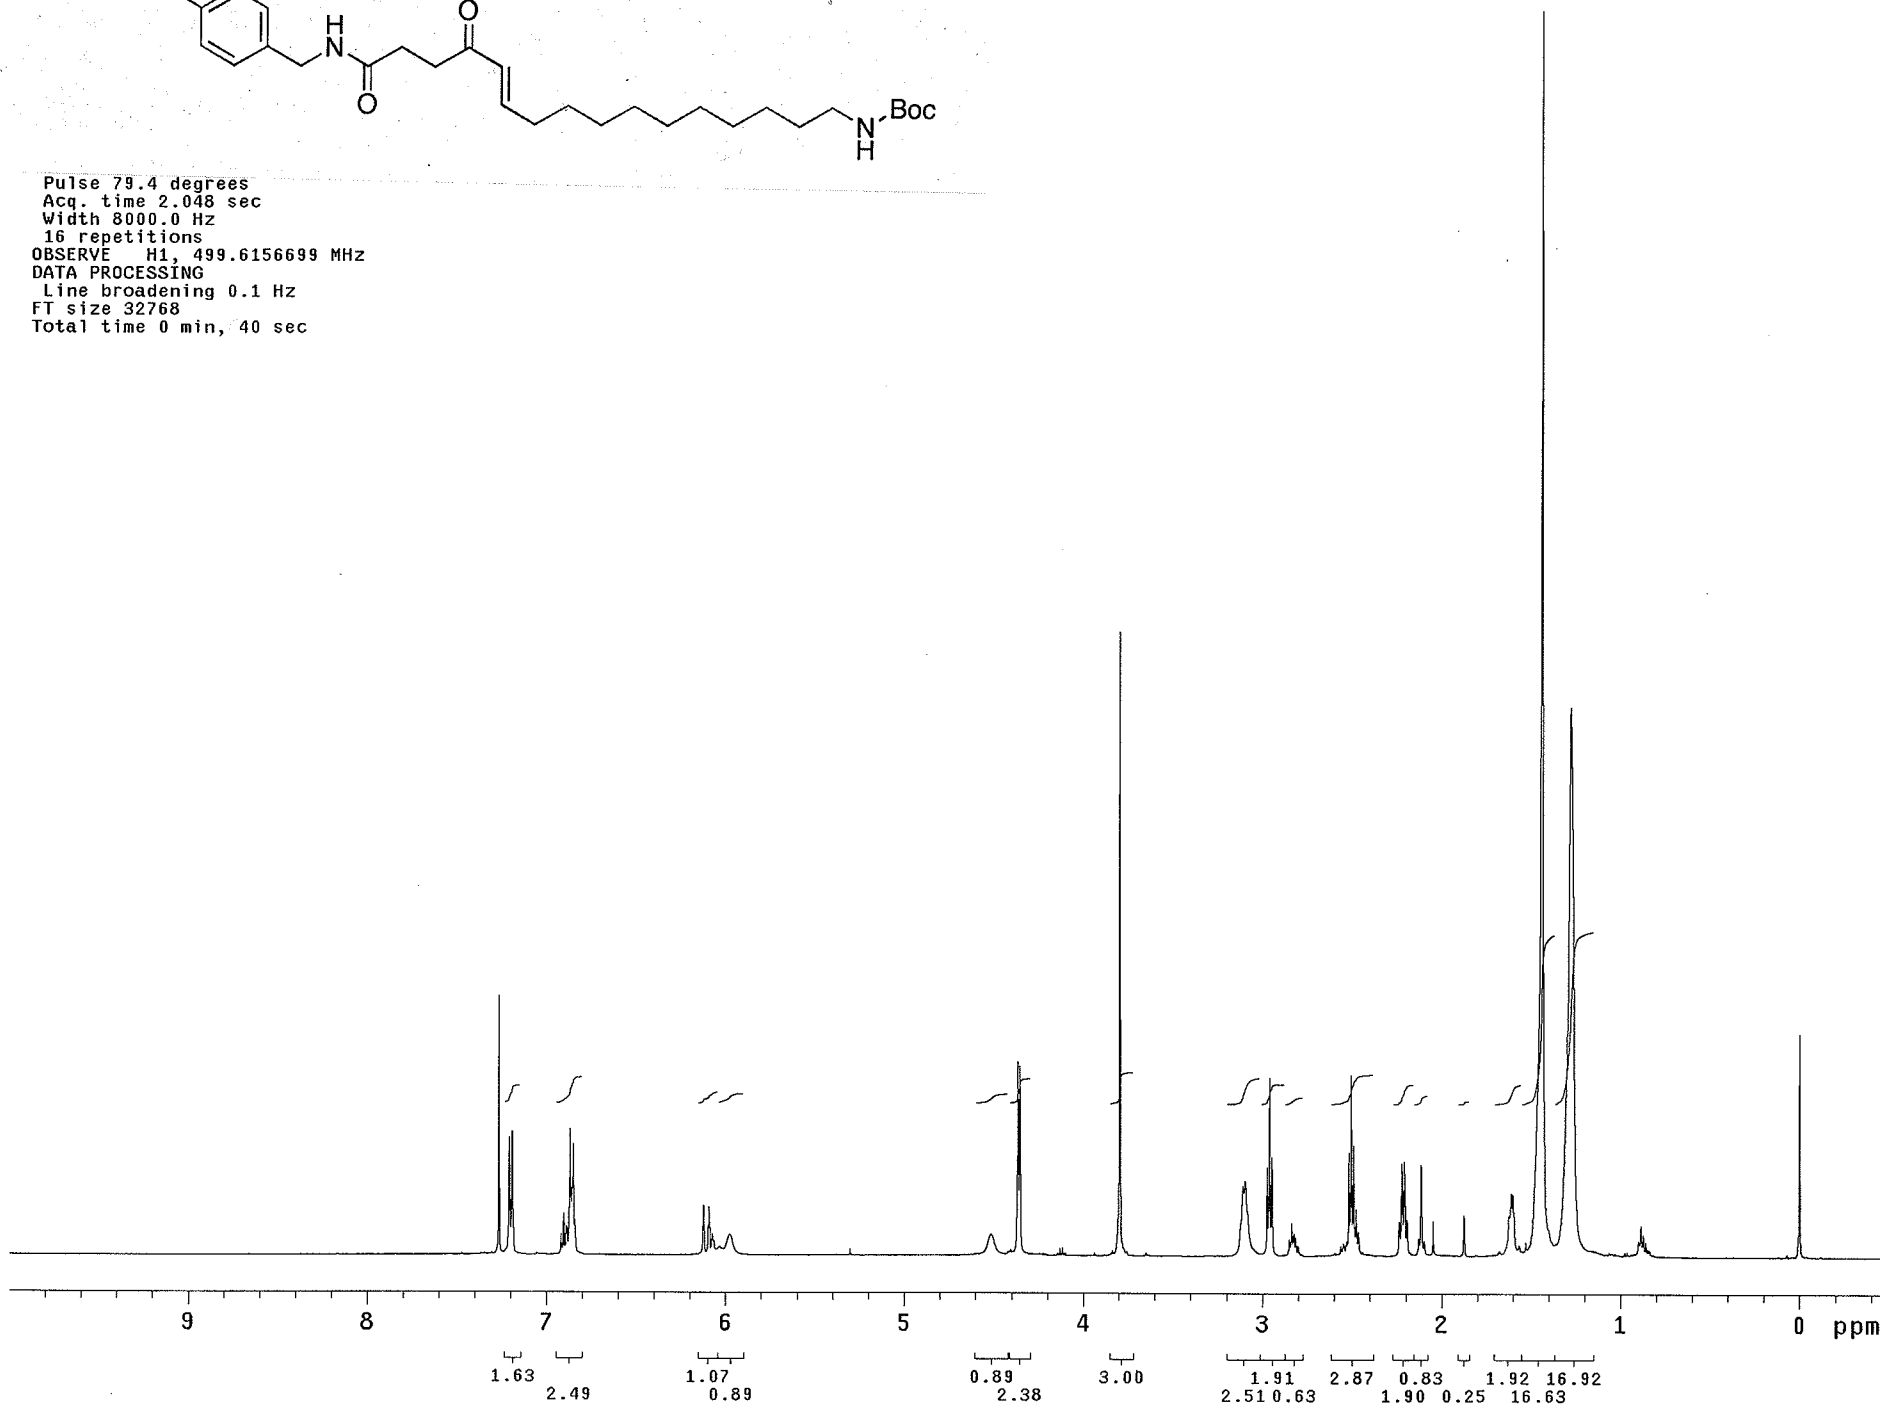

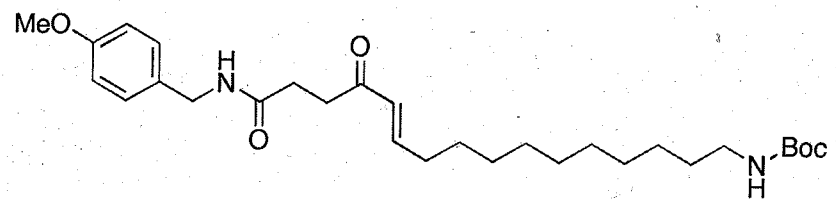

Pulse 40.0 degrees  
Acq. time 1.092 sec  
Width 29996.3 Hz  
10000 repetitions  
OBSERVE C13, 125.6284643 MHz  
DECOUPLE H1, 499.6181772 MHz  
Power 34 dB  
continuously on  
WALTZ-16 modulated  
DATA PROCESSING  
Line broadening 1.0 Hz  
FT size 65536  
Total time 3 hr, 3 min, 33 sec

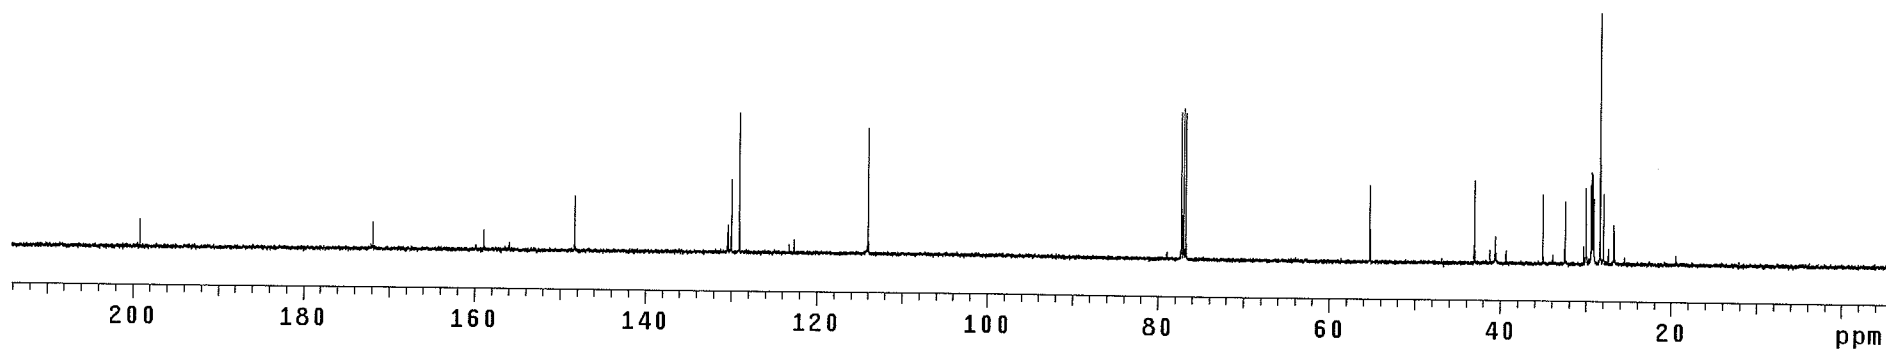



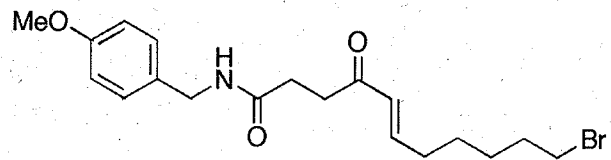

Relax. delay 0.200 sec  
 Pulse 79.4 degrees  
 Acq. time 2.048 sec  
 Width 8000.0 Hz  
 16 repetitions  
 OBSERVE H1, 499.6156699 MHz  
 DATA PROCESSING  
 Line broadening 0.1 Hz  
 FT size 32768  
 Total time 0 min, 40 sec

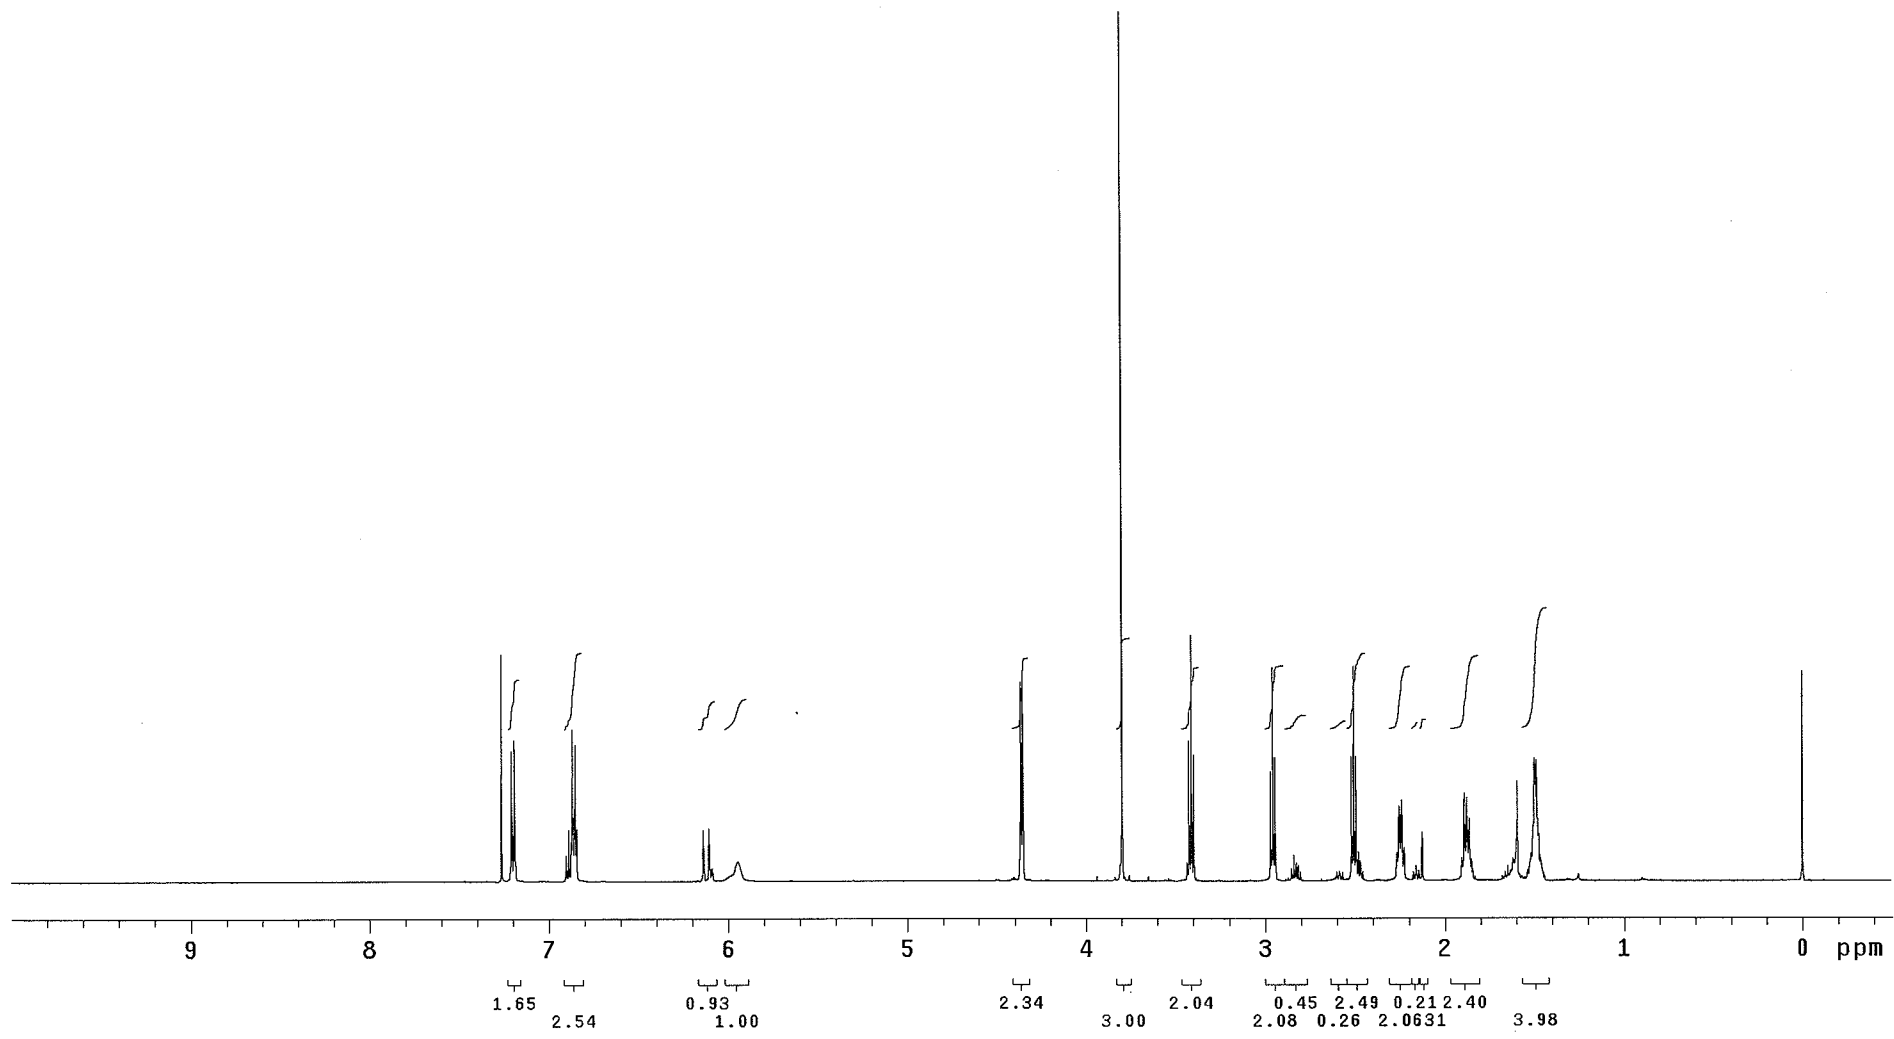

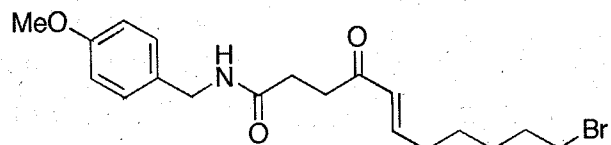

File: 6904-4-13C

Pulse Sequence: s2pu1

Solvent: CDC13

Temp. 23.0 C / 296.1 K

User: 1-14-87

Pulse 40.0 degrees

Acq. time 1.092 sec

Width 29996.3 Hz

100000 repetitions

OBSERVE C13, 125.6284634 MHz

DECOUPLE H1, 499.6181772 MHz

Power 34 dB

continuously on

WALTZ-16 modulated

DATA PROCESSING

Line broadening 1.0 Hz

FT size 65536

Total time 30 hr, 35 min

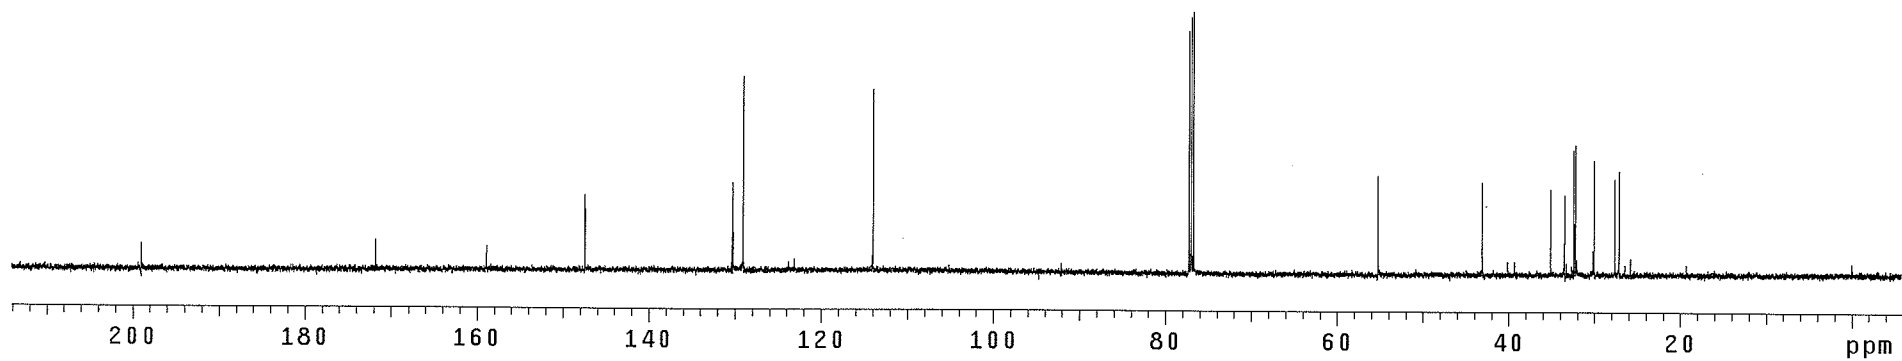

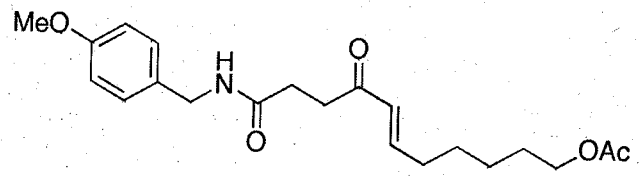

Relax. delay 0.200 sec  
 Pulse 79.4 degrees  
 Acq. time 2.048 sec  
 Width 8000.0 Hz  
 16 repetitions  
 OBSERVE H1, 499.6156674 MHz  
 DATA PROCESSING  
 Line broadening 0.1 Hz  
 FT size 32768  
 Total time 0 min, 40 sec

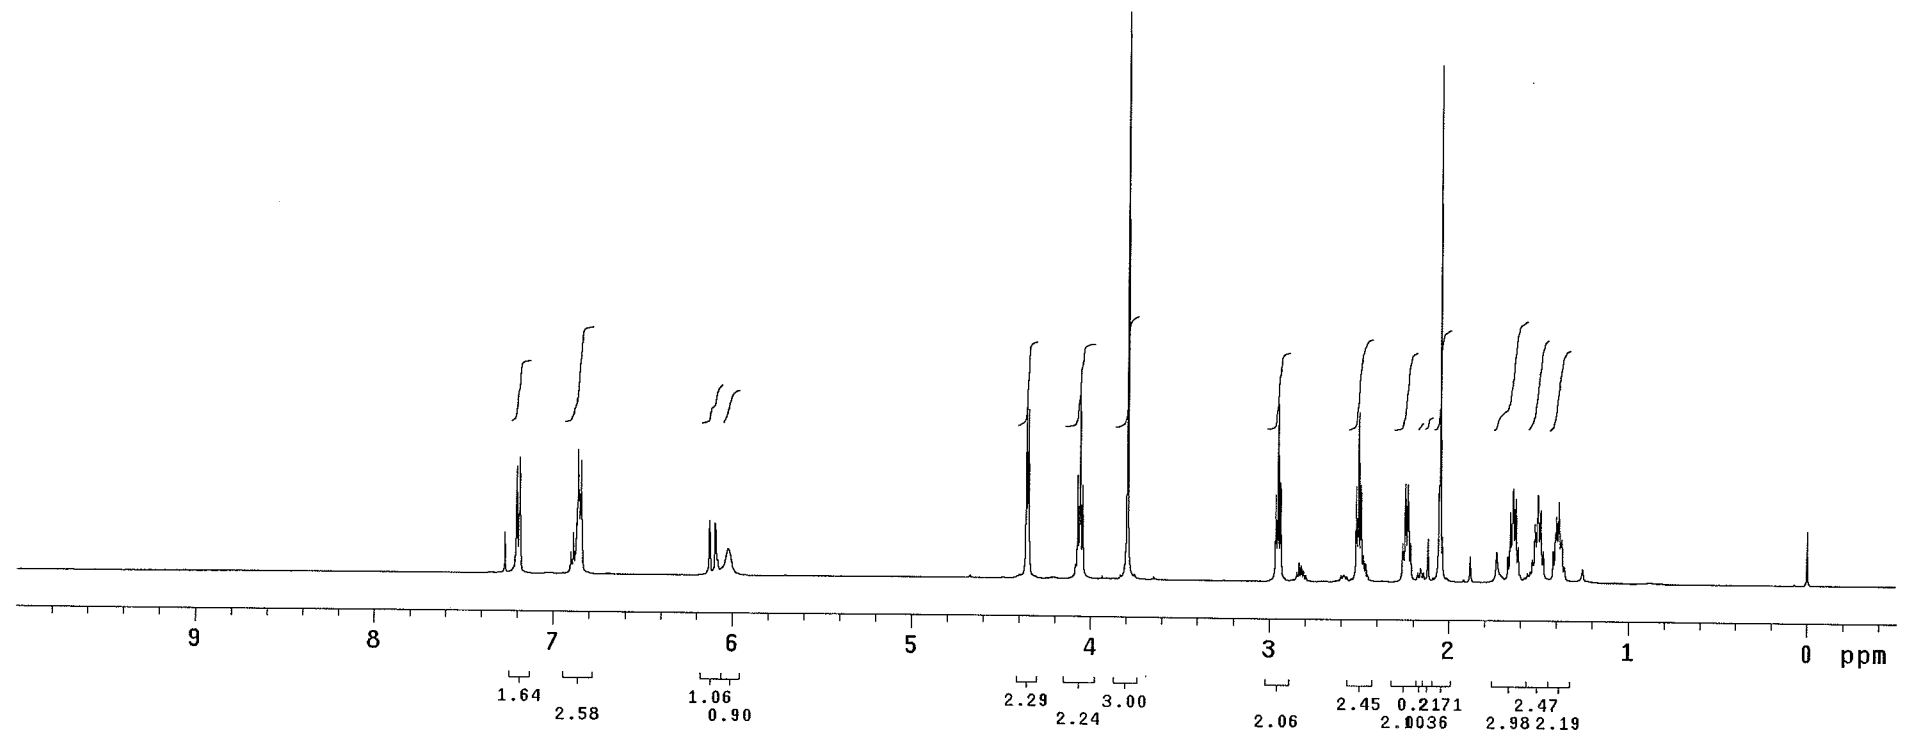

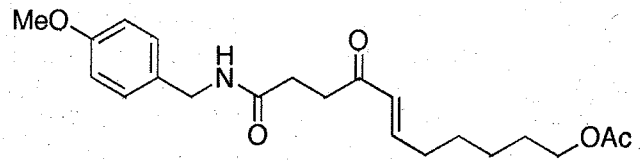

Pulse 40.0 degrees  
Acq. time 1.092 sec  
Width 29996.3 Hz  
10000 repetitions  
OBSERVE C13, 125.6284689 MHz  
DECOUPLE H1, 499.6181772 MHz  
Power 34 dB  
continuously on  
WALTZ-16 modulated  
DATA PROCESSING  
Line broadening 1.0 Hz  
FT size 65536  
Total time 3 hr, 3 min, 33 sec

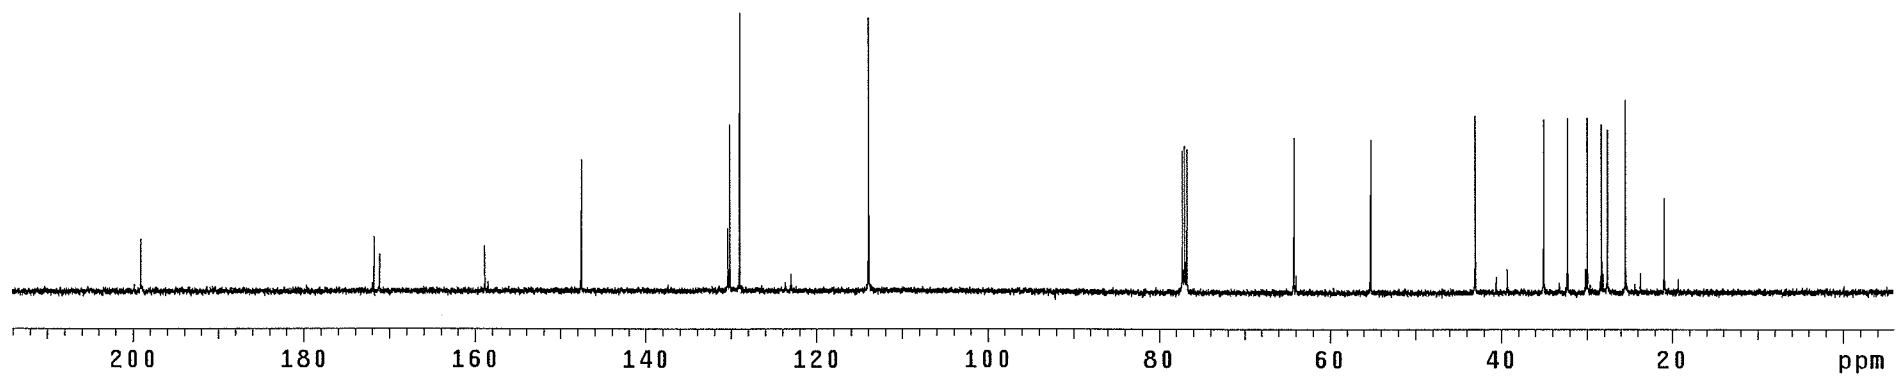

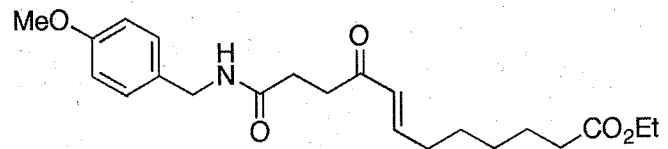

Relax. delay 0.200 sec  
 Pulse 79.4 degrees  
 Acq. time 2.048 sec  
 Width 8000.0 Hz  
 16 repetitions  
 OBSERVE H1, 499.6156684 MHz  
 DATA PROCESSING  
 Line broadening 0.1 Hz  
 FT size 32768  
 Total time 0 min, 40 sec

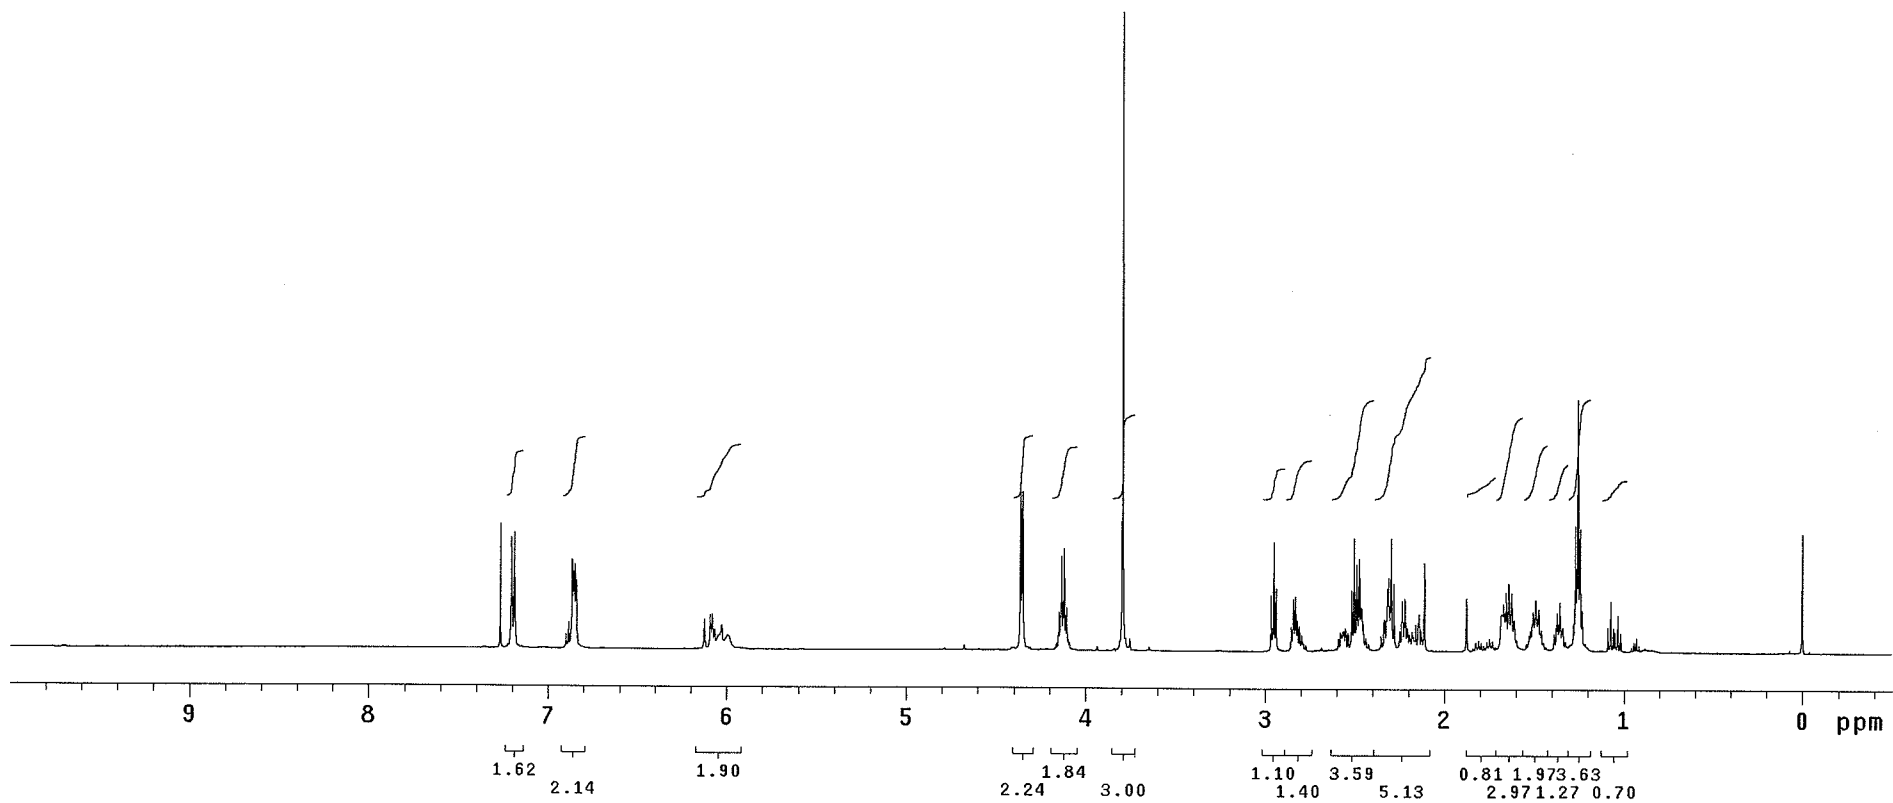

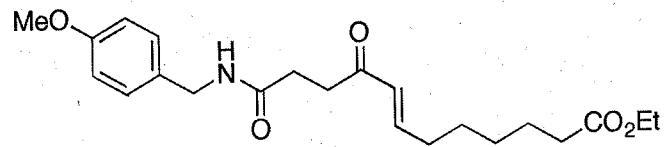

Pulse 40.0 degrees  
Acq. time 1.092 sec  
Width 29996.3 Hz  
6892 repetitions  
OBSERVE C13, 125.6284653 MHz  
DECOUPLE H1, 499.6181772 MHz  
Power 34 dB  
continuously on  
WALTZ-16 modulated  
DATA PROCESSING  
Line broadening 1.0 Hz  
FT size 65536  
Total time 3 hr, 3 min, 33 sec

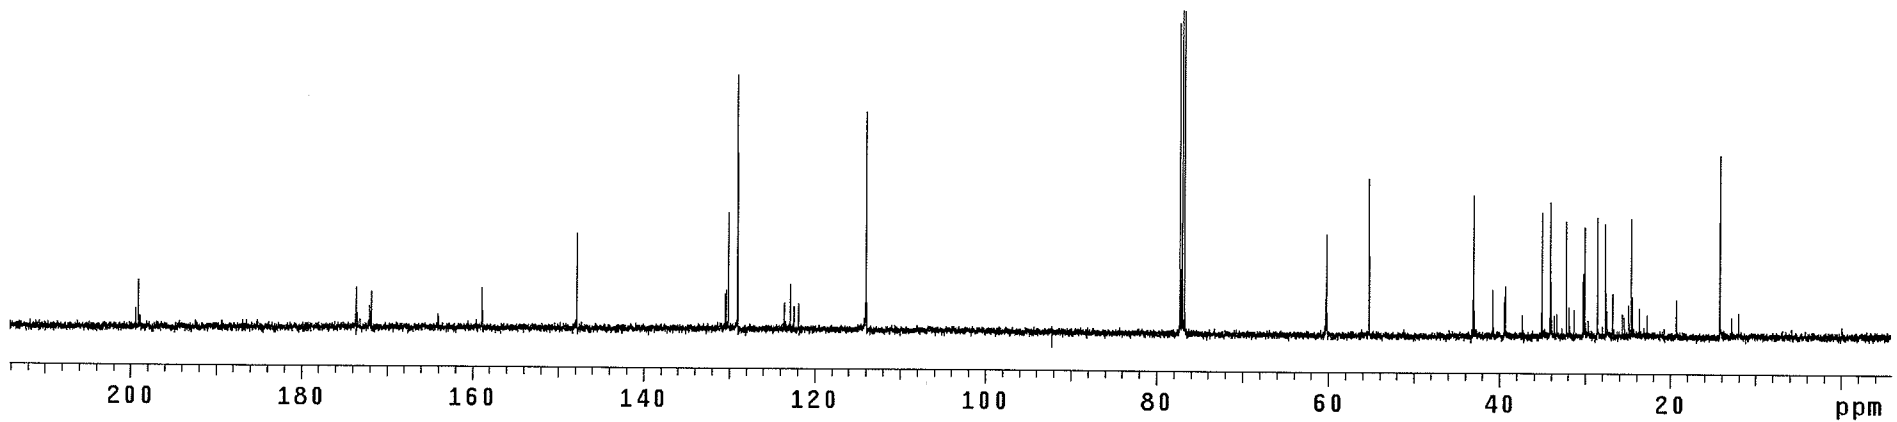

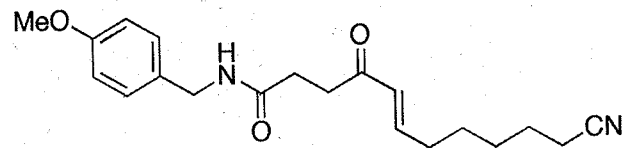

Relax. delay 0.200 sec  
 Pulse 79.4 degrees  
 Acq. time 2.048 sec  
 Width 8000.0 Hz  
 16 repetitions  
 OBSERVE H1, 499.6156704 MHz  
 DATA PROCESSING  
 Line broadening 0.1 Hz  
 FT size 32768  
 Total time 0 min, 40 sec

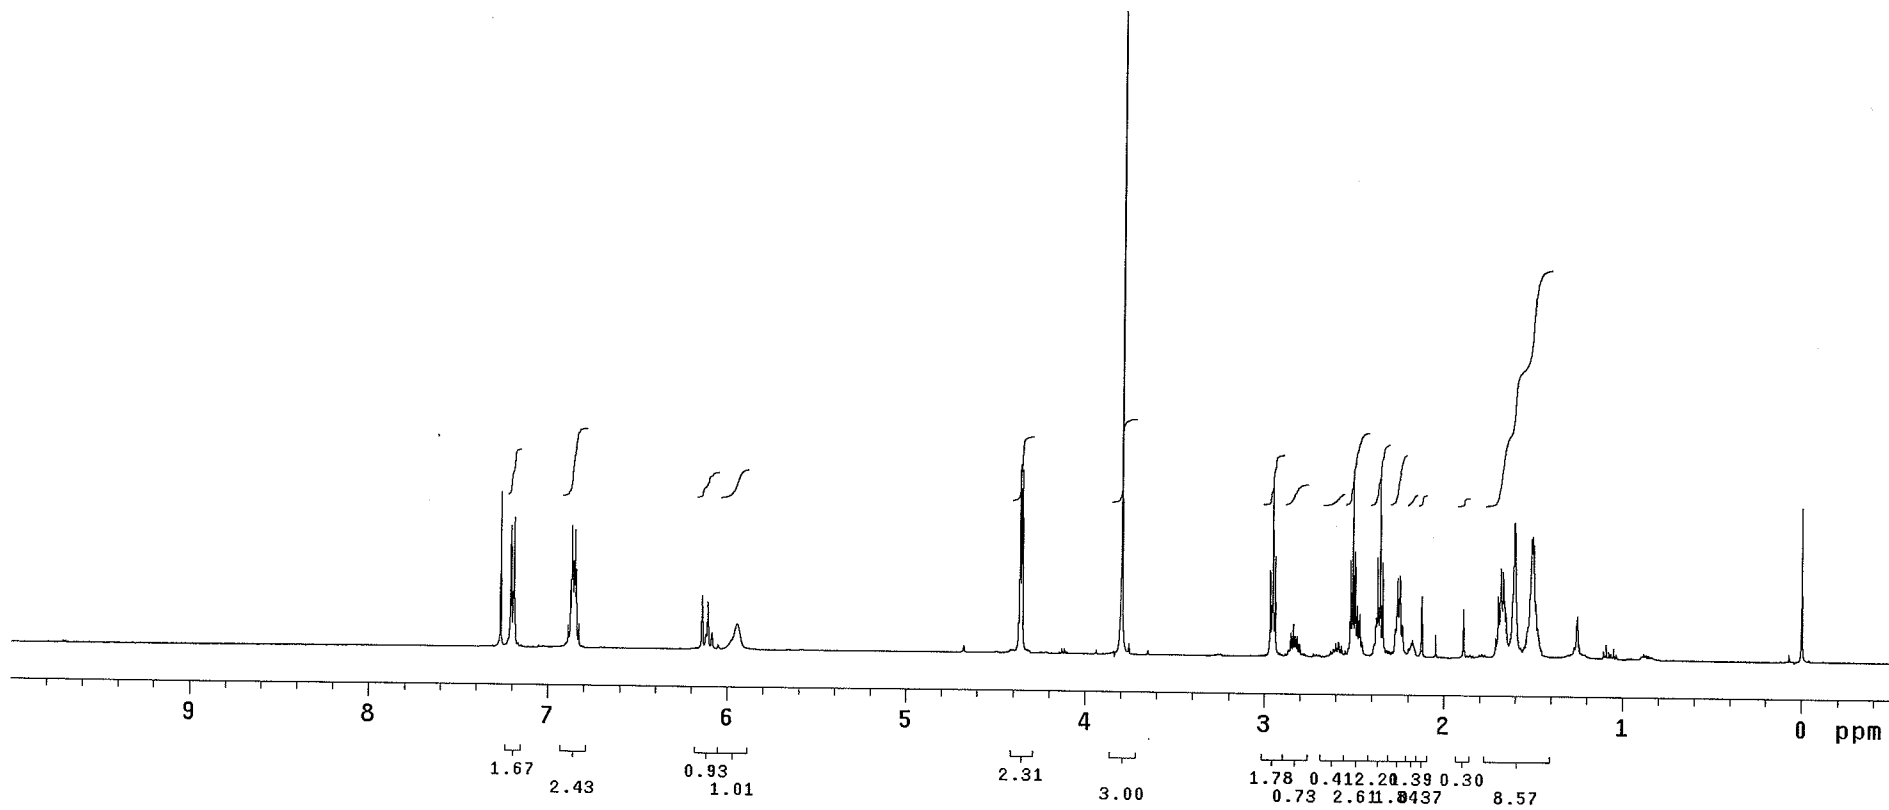

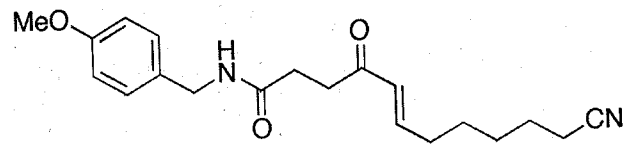

Pulse 40.0 degrees  
Acq. time 1.092 sec  
Width 29996.3 Hz  
25523 repetitions  
OBSERVE C13, 125.6284653 MHz  
DECOUPLE H1, 499.6181772 MHz  
Power 34 dB  
continuously on  
WALTZ-16 modulated  
DATA PROCESSING  
Line broadening 1.0 Hz  
FT size 65536  
Total time 30 hr, 35 min, 30 sec

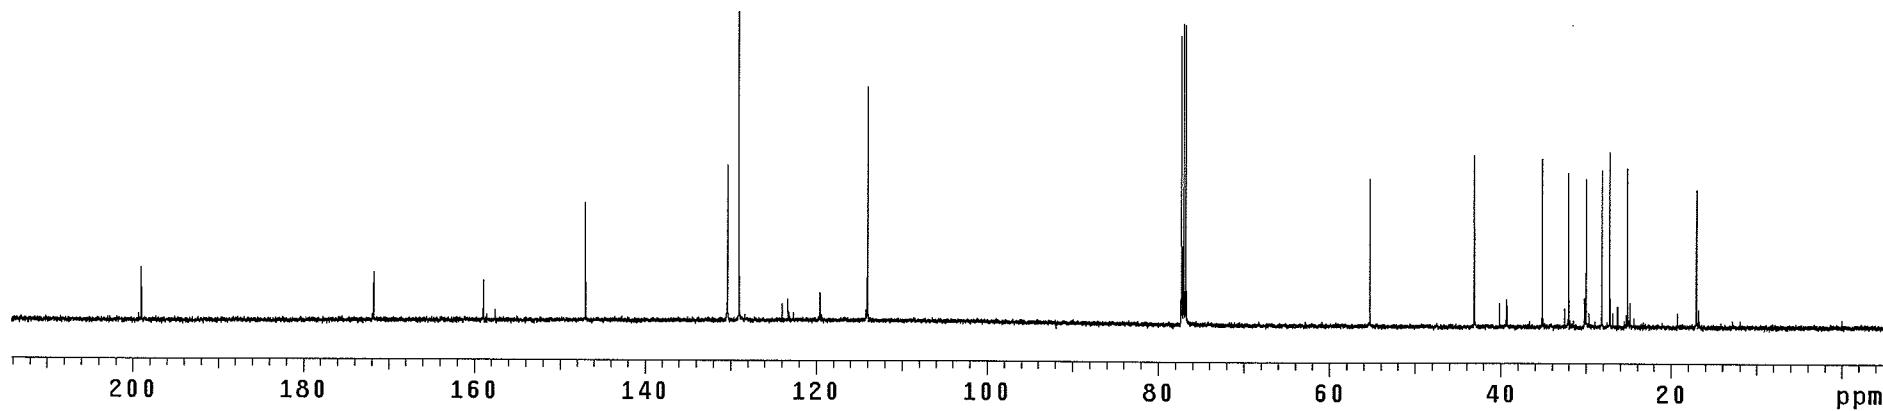



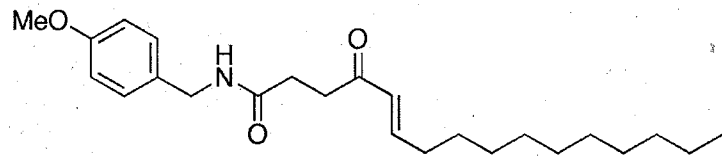

Relax. delay 0.200 sec  
 Pulse 79.4 degrees  
 Acq. time 2.048 sec  
 Width 8000.0 Hz  
 16 repetitions  
 OBSERVE H1, 499.6156694 MHz  
 DATA PROCESSING  
 Line broadening 0.1 Hz  
 FT size 32768  
 Total time 0 min, 40 sec

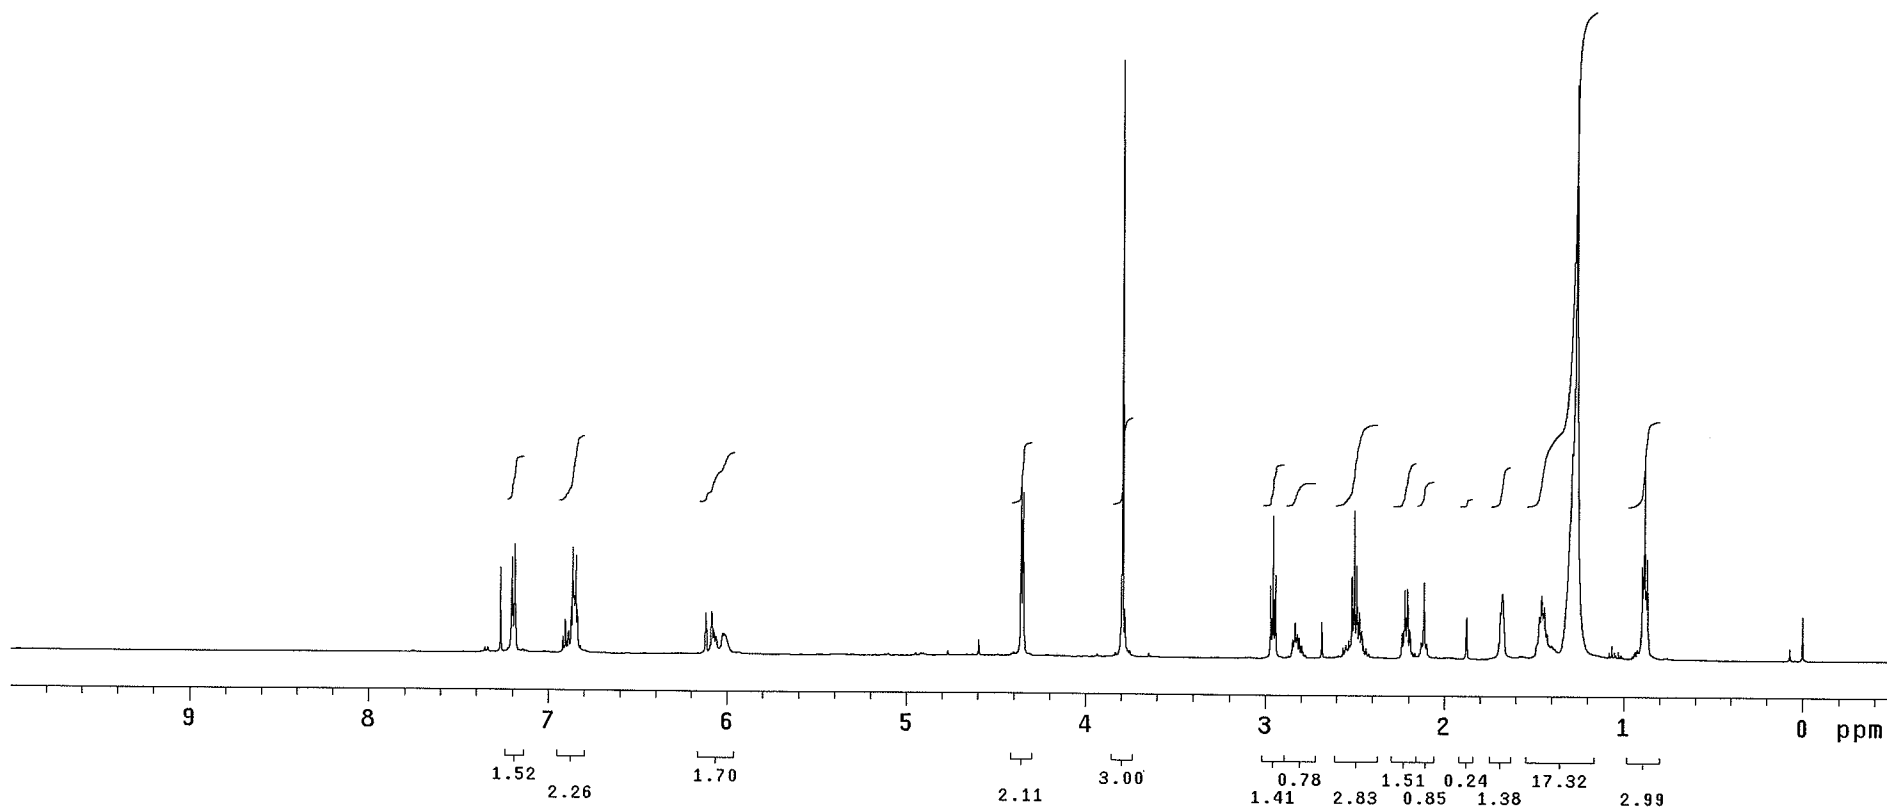

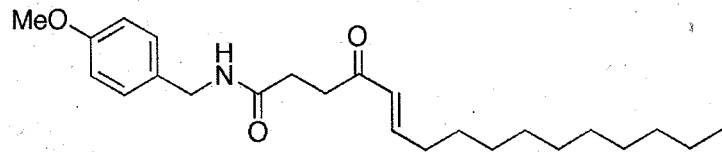

Pulse 40.0 degrees  
Acq. time 1.092 sec  
Width 29996.3 Hz  
25720 repetitions  
OBSERVE C13, 125.6284625 MHz  
DECOUPLE H1, 499.6181772 MHz  
Power 34 dB  
continuously on  
WALTZ-16 modulated  
DATA PROCESSING  
Line broadening 1.0 Hz  
FT size 65536  
Total time 30 hr, 35 min, 30 sec

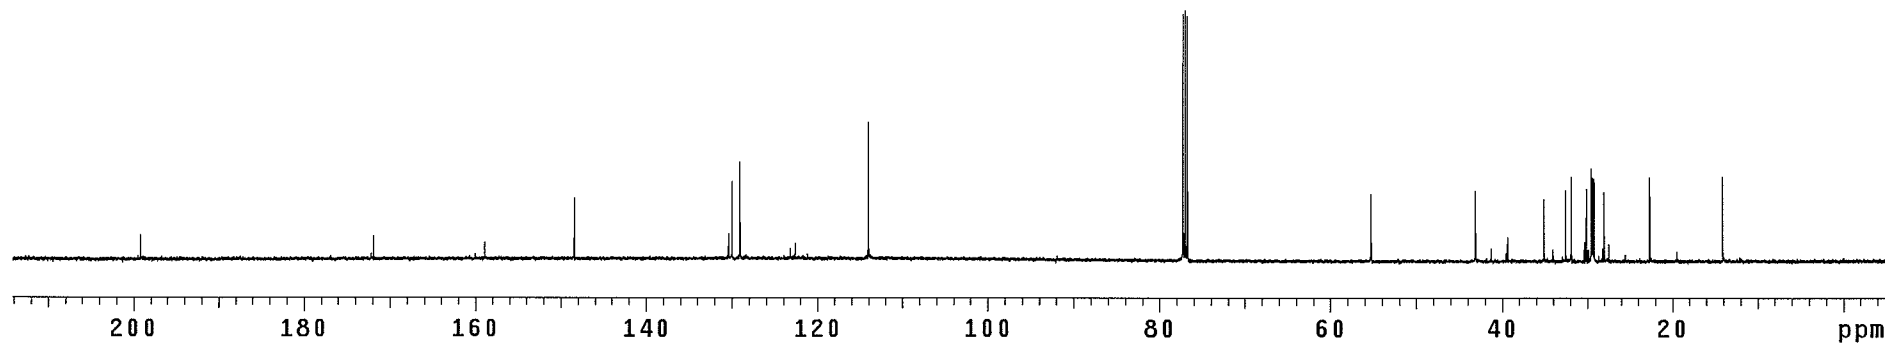

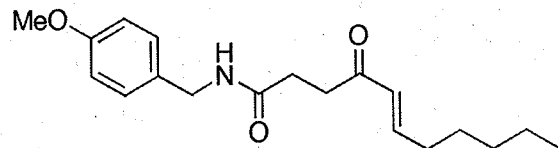

Pulse 79.4 degrees  
Acq. time 2.048 sec  
Width 8000.0 Hz  
16 repetitions  
OBSERVE H1, 499.6156699 MHz  
DATA PROCESSING  
Line broadening 0.1 Hz  
FT size 32768  
Total time 0 min, 40 sec

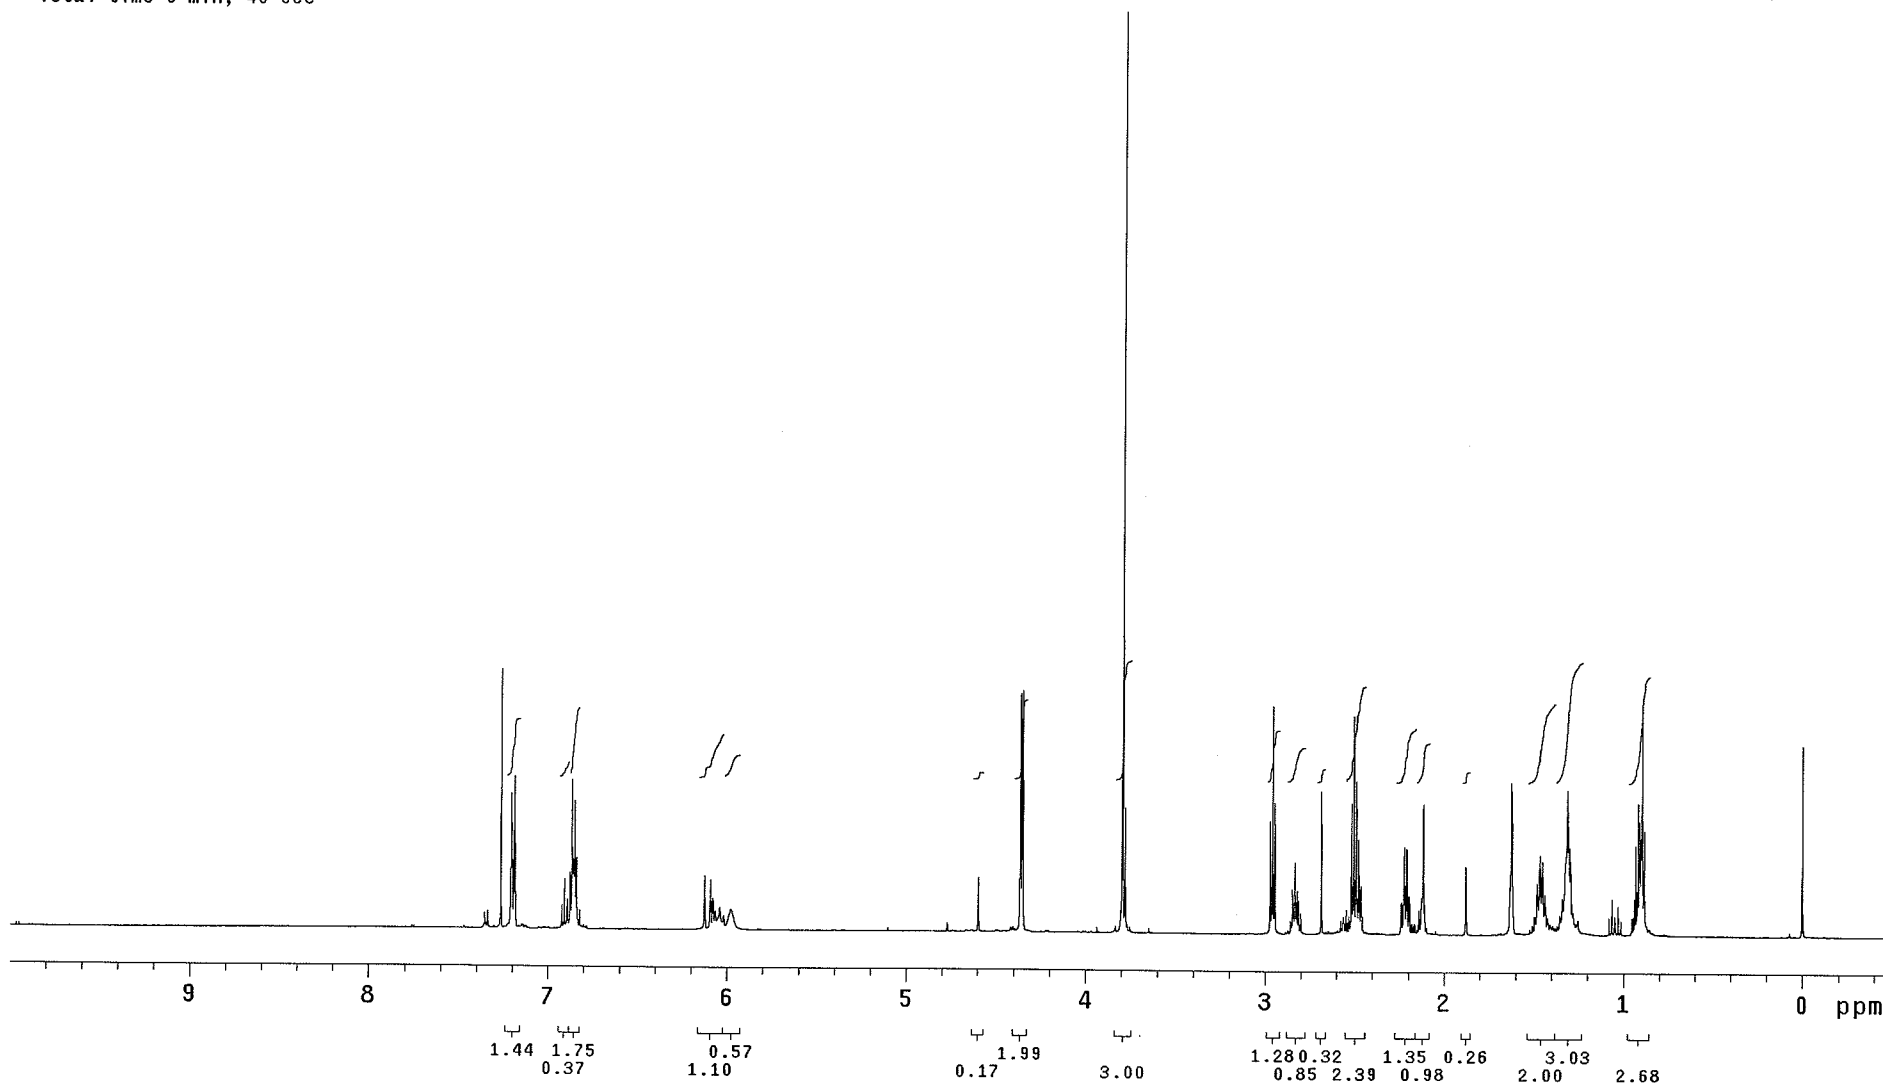

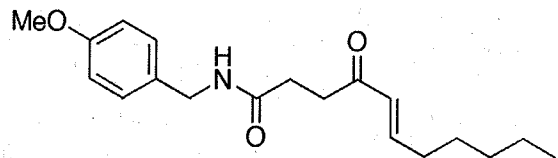

Pulse 40.0 degrees  
Acq. time 1.092 sec  
Width 29996.3 Hz  
23735 repetitions  
OBSERVE C13, 125.6284616 MHz  
DECOUPLE H1, 499.6181772 MHz  
Power 34 dB  
continuously on  
WALTZ-16 modulated  
DATA PROCESSING  
Line broadening 1.0 Hz  
FT size 65536  
Total time 30 hr, 35 min, 30 sec

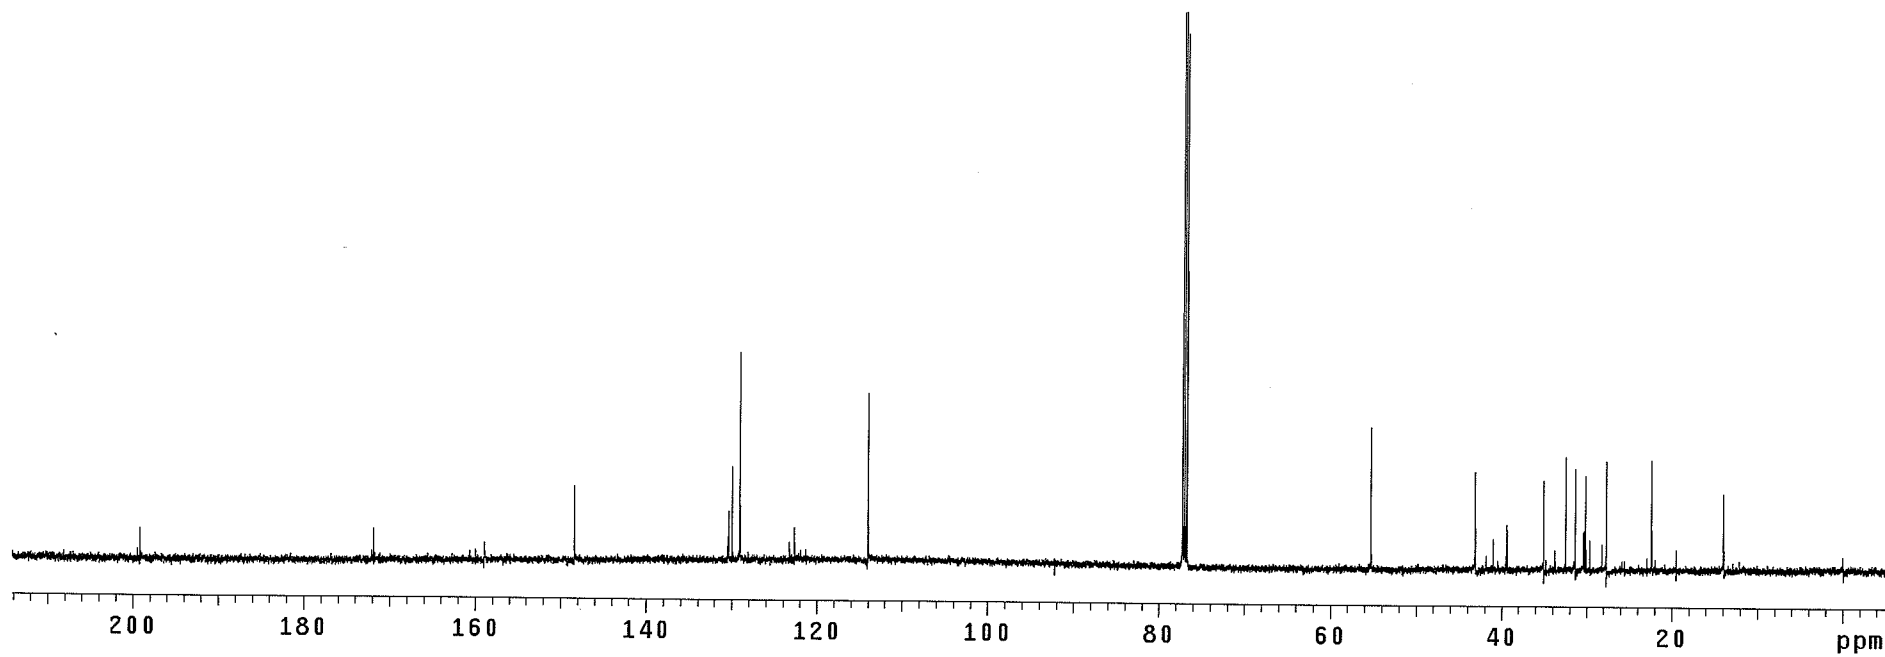

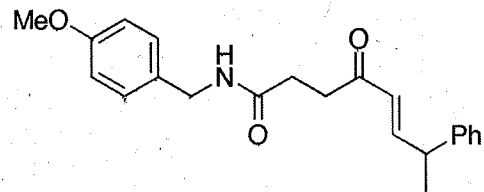

File: 6901-2-1H

Pulse Sequence: s2pu1  
Solvent: CDC13

Temp. 23.0 C / 296.1 K

Relax. delay 0.200 sec  
Pulse 79.4 degrees  
Acq. time 2.048 sec  
Width 8000.0 Hz  
16 repetitions  
OBSERVE H1, 499.6156790 MHz  
DATA PROCESSING  
Line broadening 0.1 Hz  
FT size 32768  
Total time 0 min

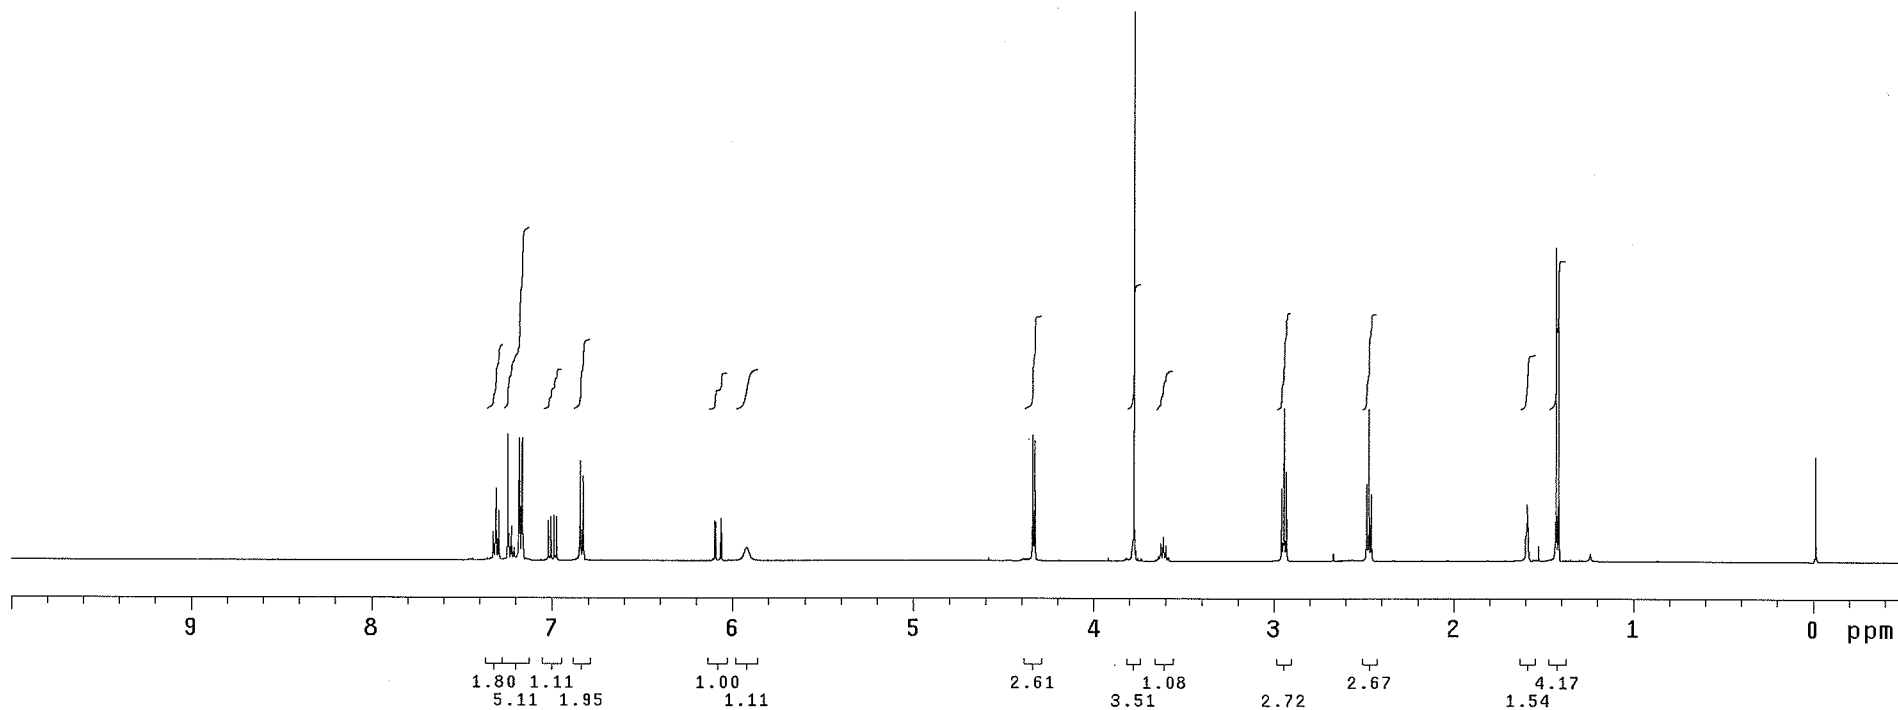

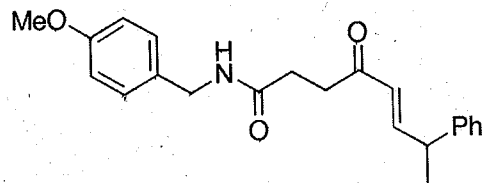

FILE: 6901-2-13C

Pulse Sequence: s2pu1  
Solvent: CDC13

Temp. 23.0 C / 296.1 K  
User: 1-14-87

Pulse 40.0 degrees  
Acq. time 1.092 sec  
Width 29996.3 Hz  
6228 repetitions  
OBSERVE C13, 125.6284616 MHz  
DECOUPLE H1, 499.6181772 MHz  
Power 34 dB  
continuously on  
WALTZ-16 modulated  
DATA PROCESSING  
Line broadening 1.0 Hz  
FT size 65536  
Total time 30 hr, 35 min

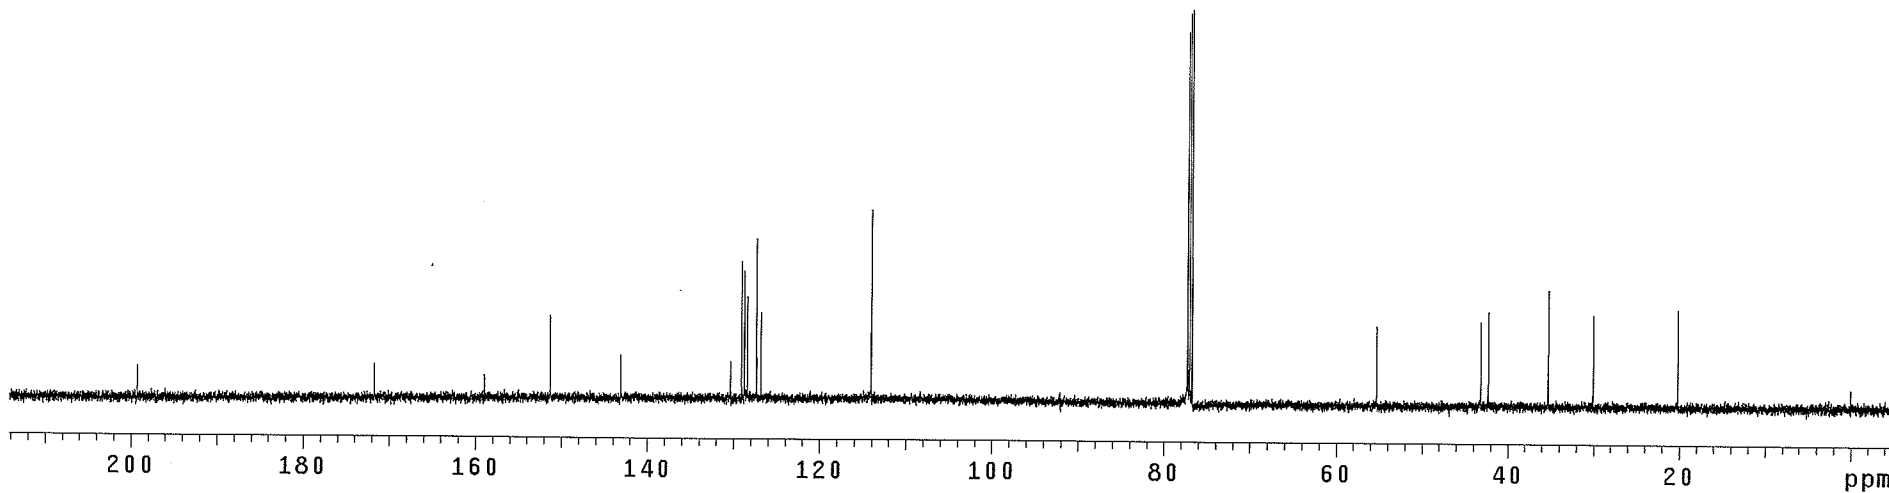

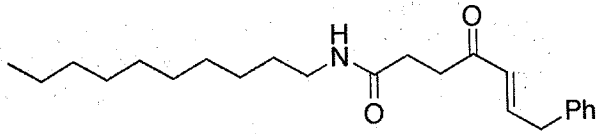

Relax. delay 0.200 sec  
Pulse 79.4 degrees  
Acq. time 2.048 sec  
Width 8000.0 Hz  
16 repetitions  
OBSERVE H1, 499.6156689 MHz  
DATA PROCESSING  
Line broadening 0.1 Hz  
FT size 32768  
Total time 0 min, 40 sec

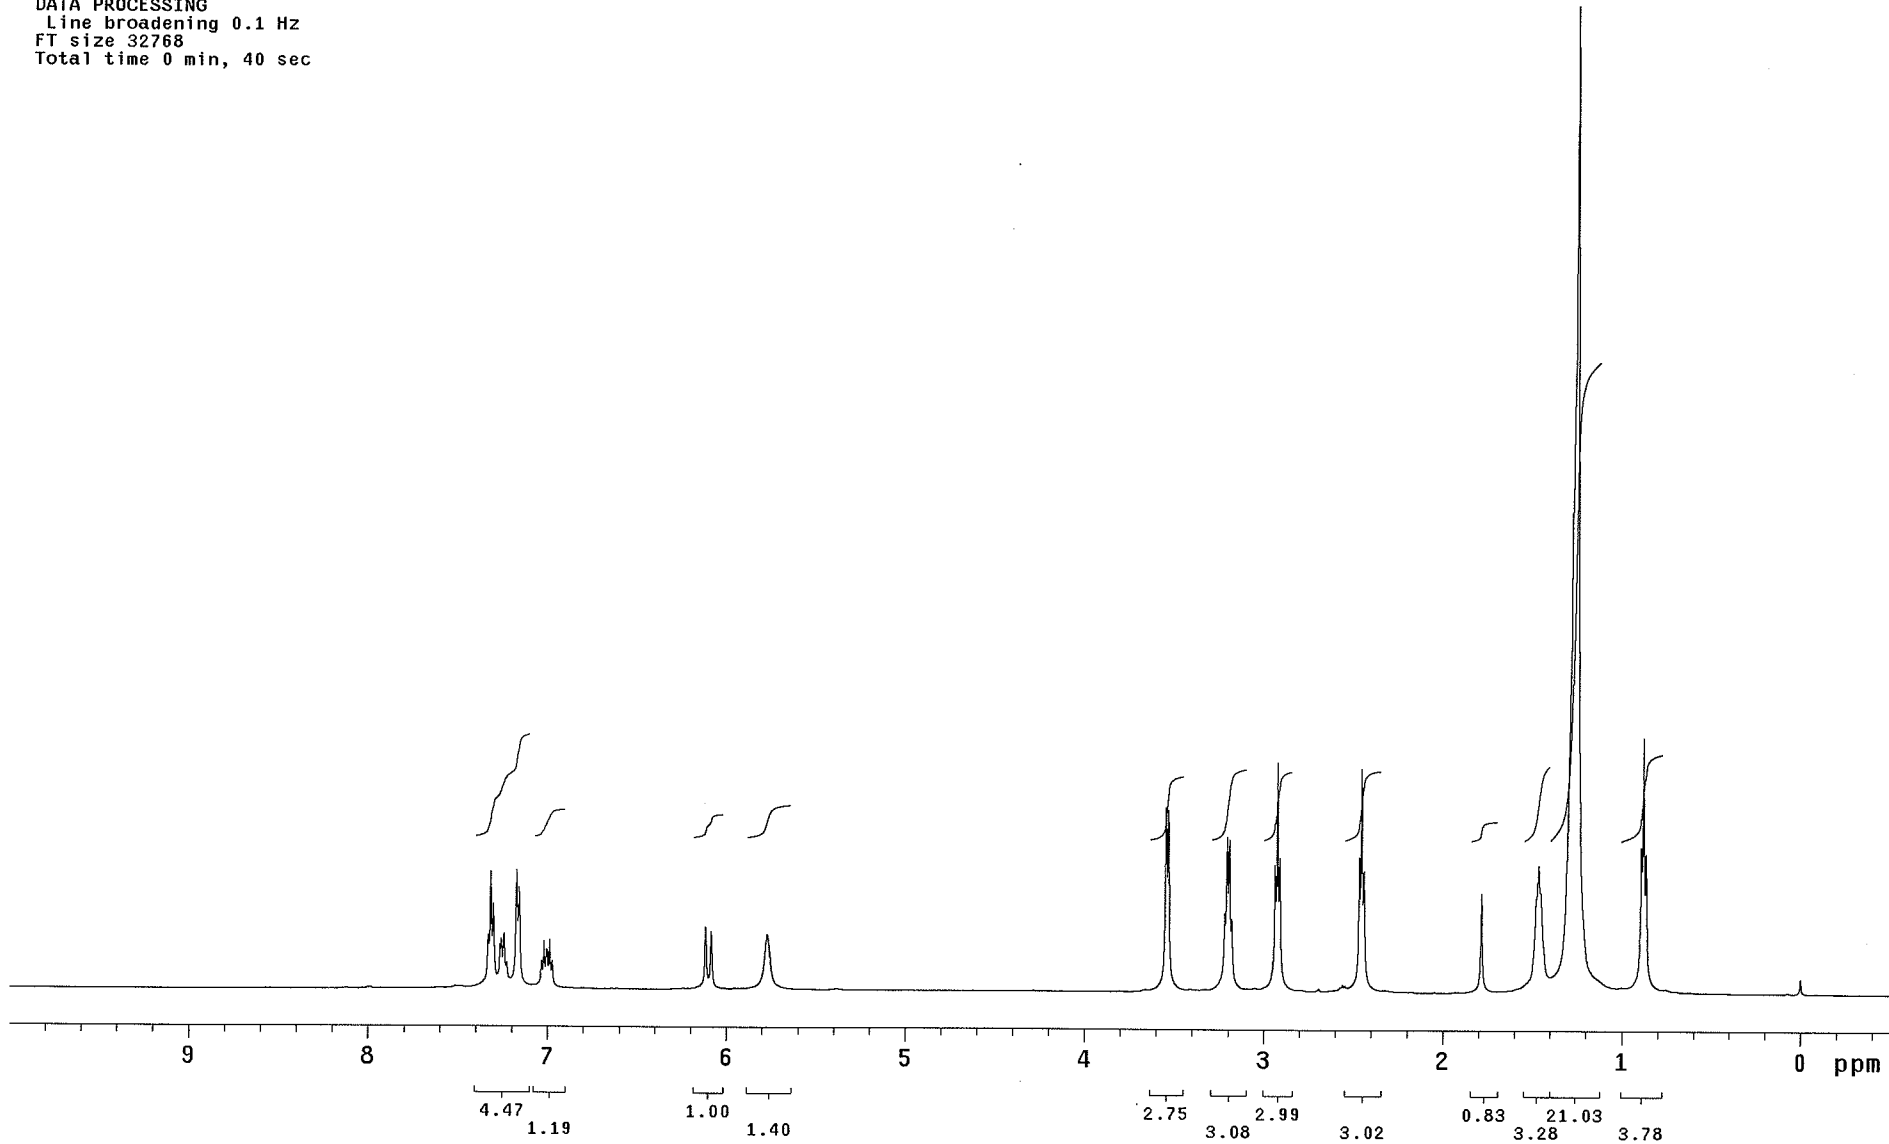

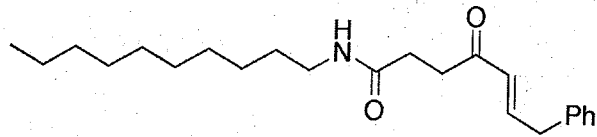

Sample directory:

File: 6901-1-13C

Pulse Sequence: s2pu1

Solvent: CDCl3

Temp. 23.0 C / 296.1 K

User: 1-14-87

Pulse 40.0 degrees

Acq. time 1.092 sec

Width 29996.3 Hz

5501 repetitions

OBSERVE C13, 125.6284653 MHz

DECOUPLE H1, 499.6181772 MHz

Power 34 dB

continuously on

WALTZ-16 modulated

DATA PROCESSING

Line broadening 1.0 Hz

FT size 65536

Total time 3 hr, 3 min

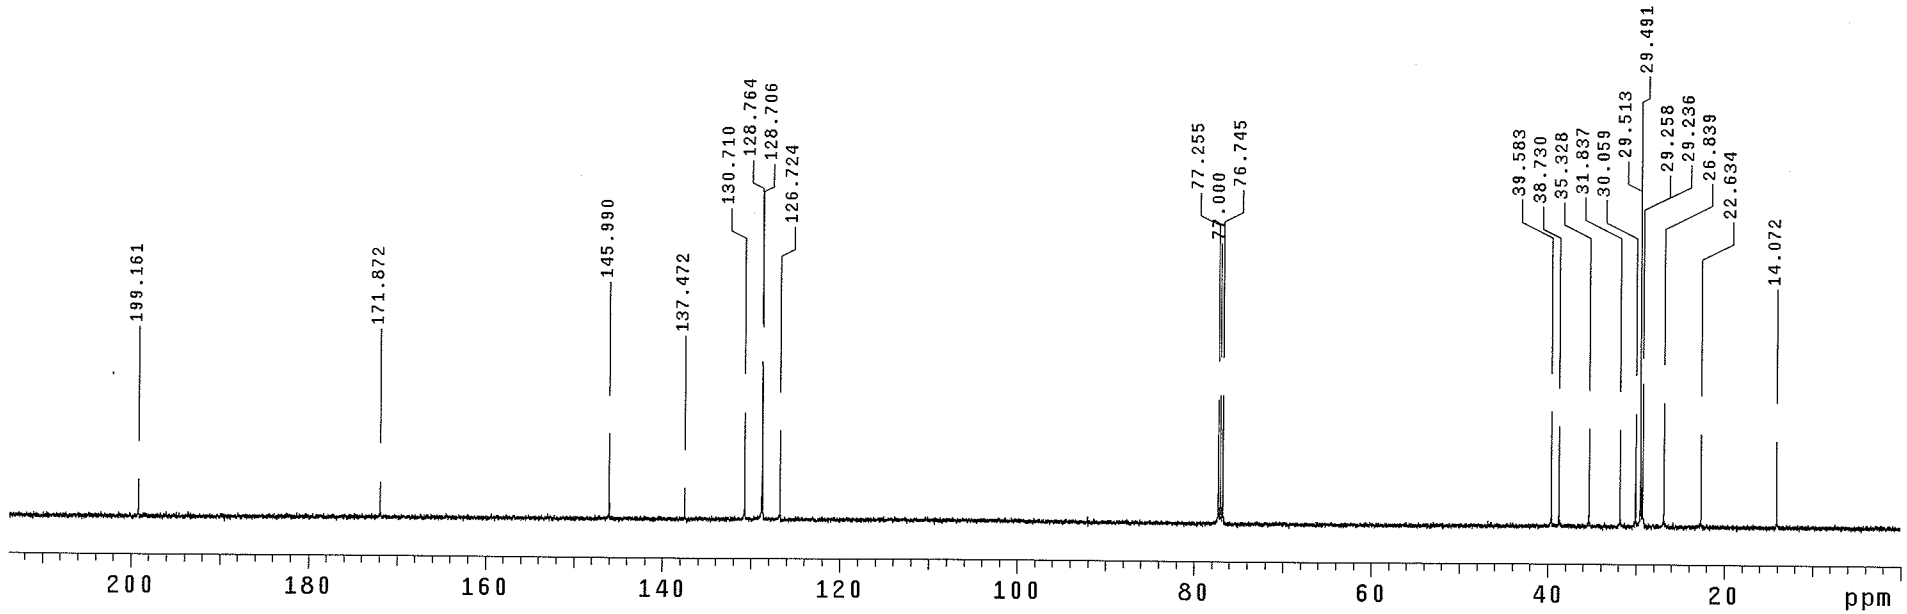



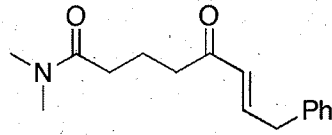

Relax. delay 0.200 sec  
Pulse 79.4 degrees  
Acq. time 2.048 sec  
Width 8000.0 Hz  
16 repetitions  
OBSERVE H1, 499.6156790 MHz  
DATA PROCESSING  
Line broadening 0.1 Hz  
FT size 32768  
Total time 0 min, 40 sec

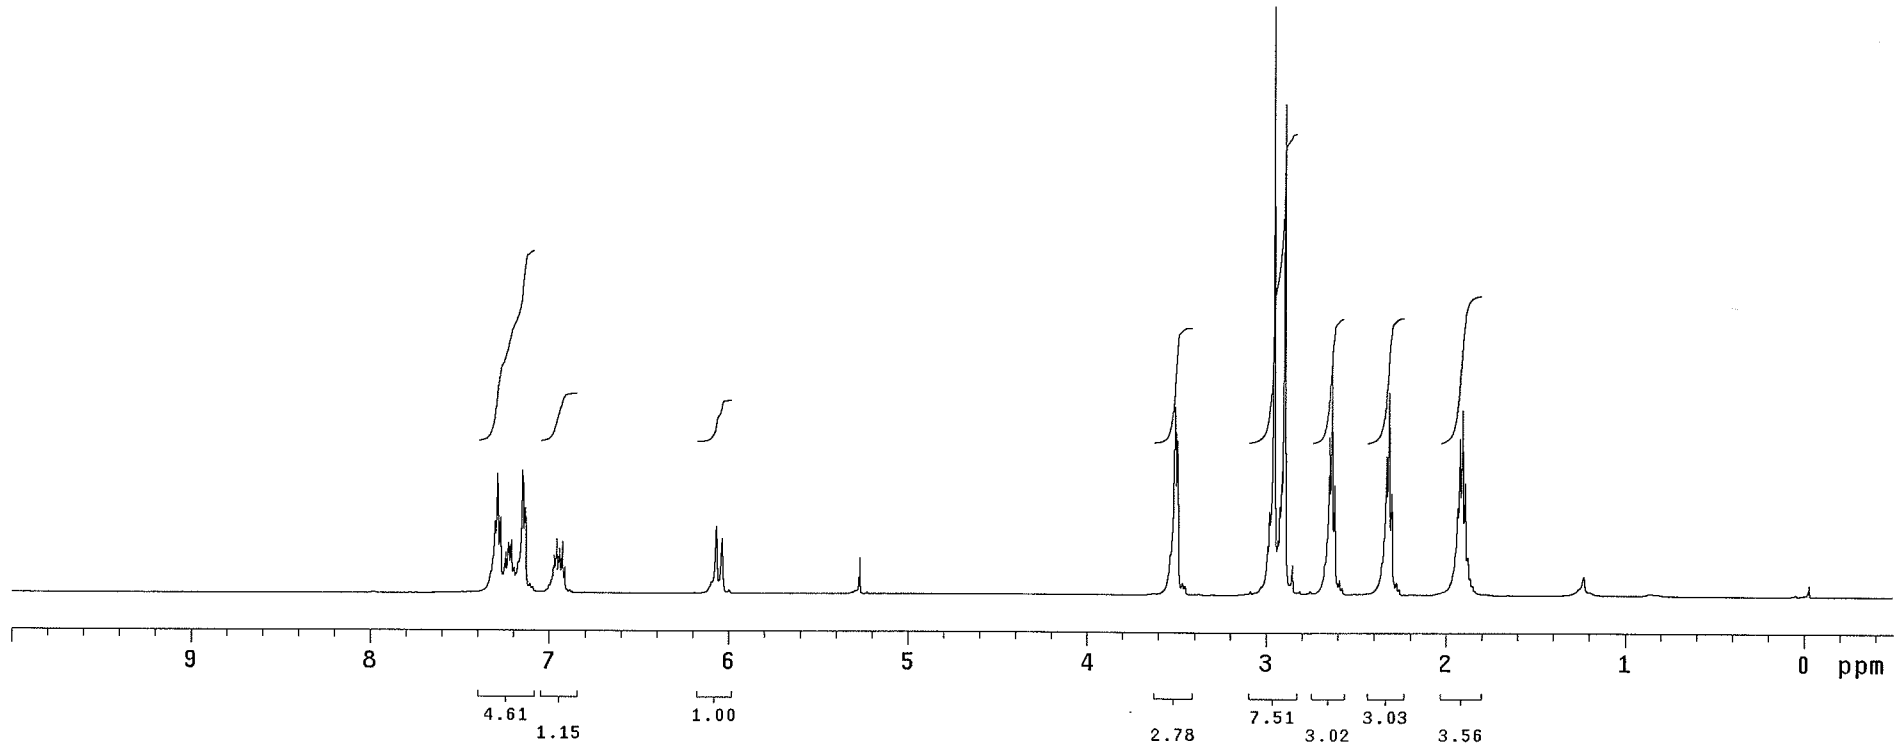

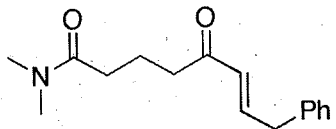

INOVA-500 "inova500"

Pulse 40.0 degrees  
Acq. time 1.092 sec  
Width 29996.3 Hz  
12915 repetitions  
OBSERVE C13, 125.6284680 MHz  
DECOUPLE H1, 499.6181772 MHz  
Power 34 dB  
continuously on  
WALTZ-16 modulated  
DATA PROCESSING  
Line broadening 1.0 Hz  
FT size 65536  
Total time 30 hr, 35 min, 30 sec

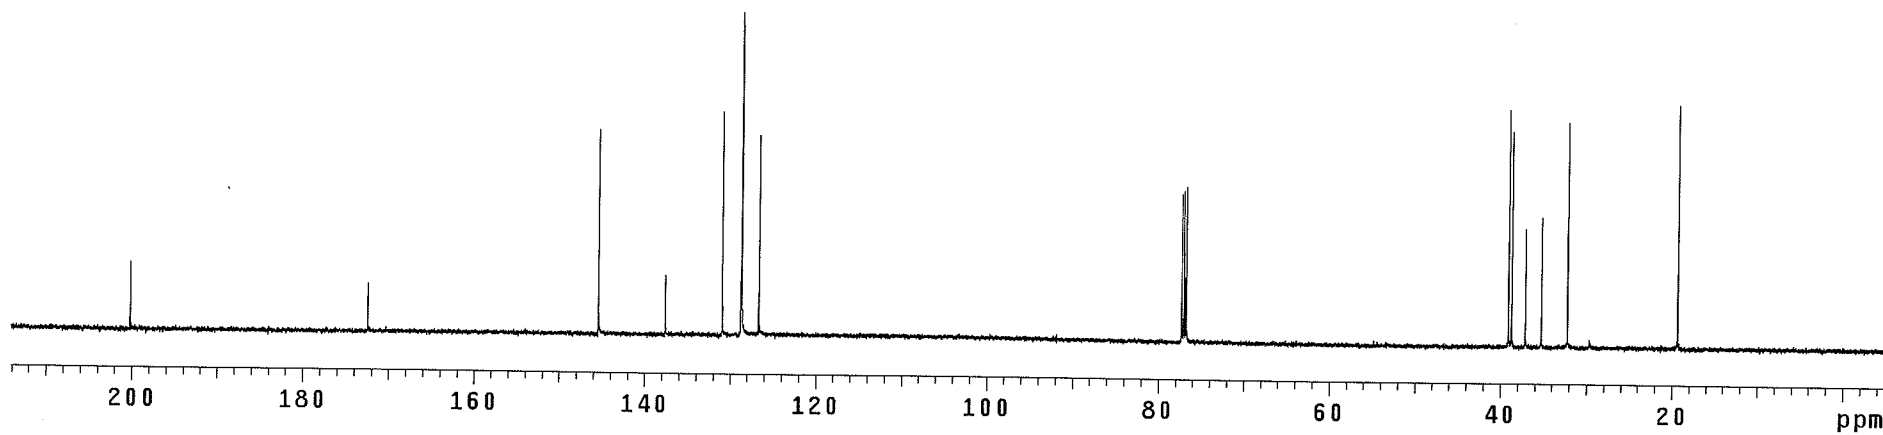

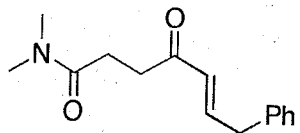

Temp. 25.00 °C  
INOVA-500 "inova500"

Relax. delay 0.200 sec  
Pulse 79.4 degrees  
Acq. time 2.048 sec  
Width 8000.0 Hz  
16 repetitions  
OBSERVE H1, 499.6156704 MHz  
DATA PROCESSING  
Line broadening 0.1 Hz  
FT size 32768  
Total time 0 min, 40 sec

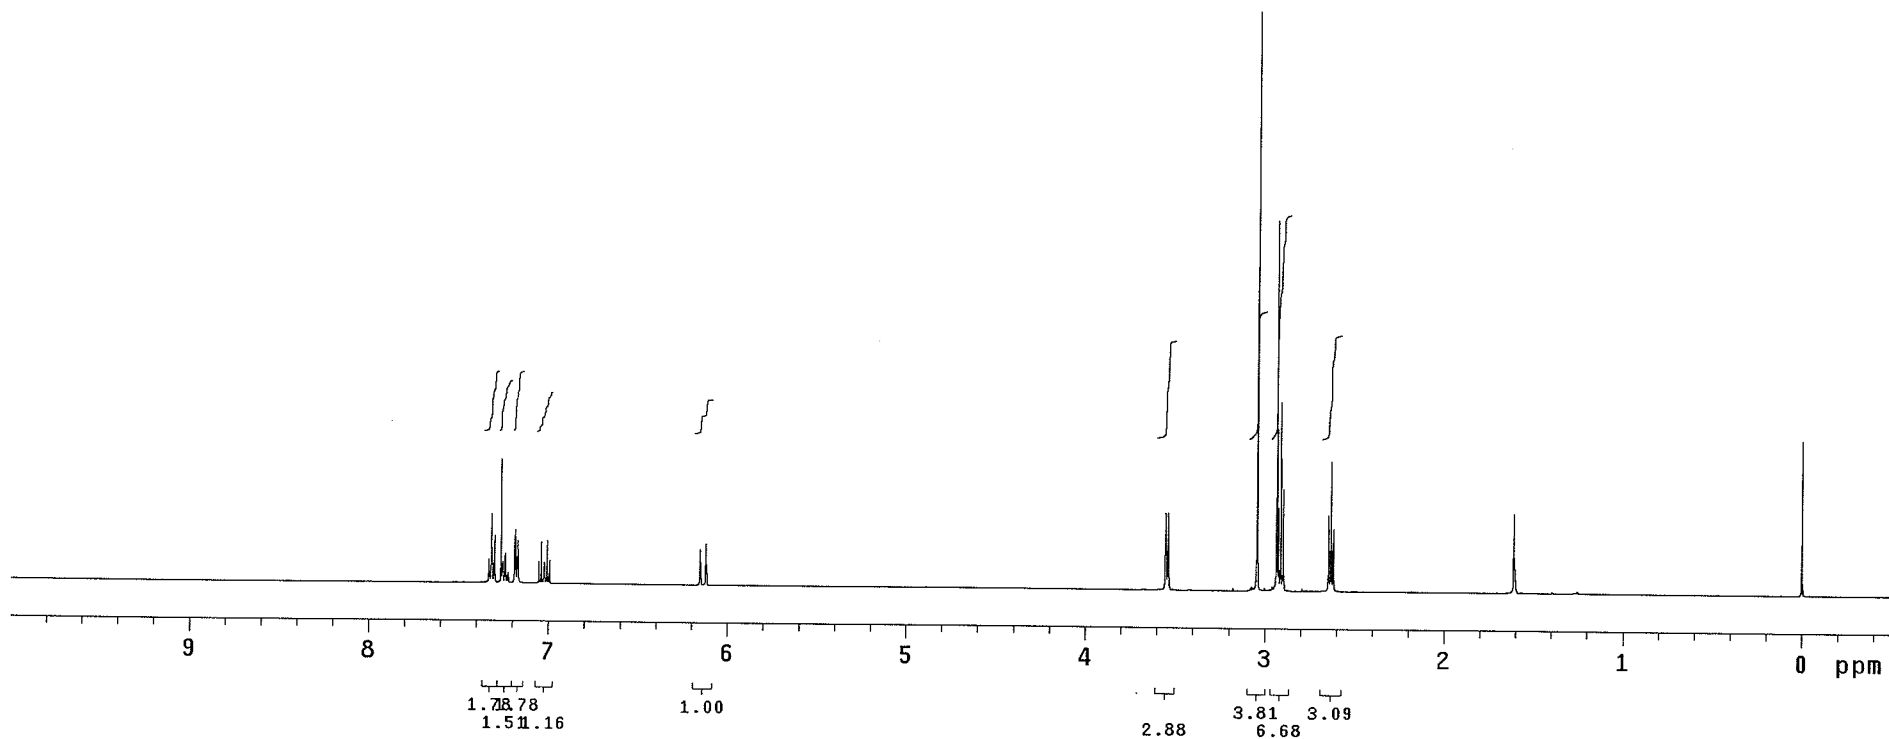

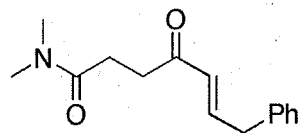

User: 1-14-87  
INOVA-500 "inova500"

Pulse 40.0 degrees  
Acq. time 1.092 sec  
Width 29996.3 Hz  
5390 repetitions  
OBSERVE C13, 125.6284616 MHz  
DECOUPLE H1, 499.6181772 MHz  
Power 34 dB  
continuously on  
WALTZ-16 modulated  
DATA PROCESSING  
Line broadening 1.0 Hz  
FT size 65536  
Total time 30 hr, 35 min, 30 sec

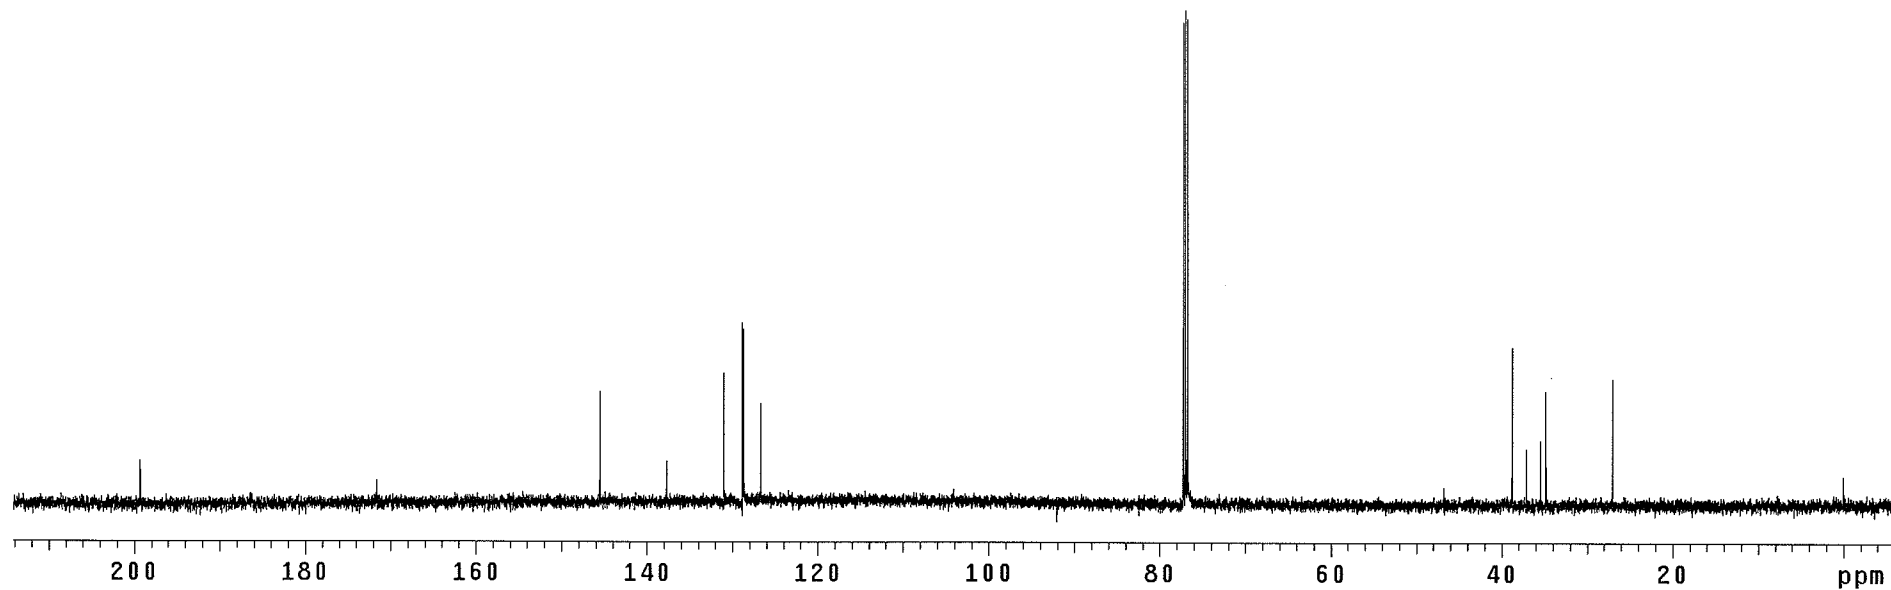

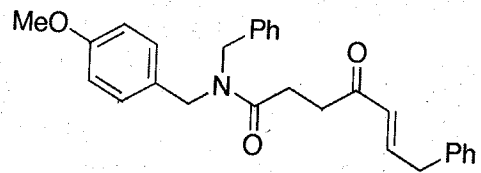

Relax. delay 0.200 sec  
Pulse 79.4 degrees  
Acq. time 2.048 sec  
Width 8000.0 Hz  
16 repetitions  
OBSERVE H1, 499.6156790 MHz  
DATA PROCESSING  
Line broadening 0.1 Hz  
FT size 32768  
Total time 0 min, 40 sec

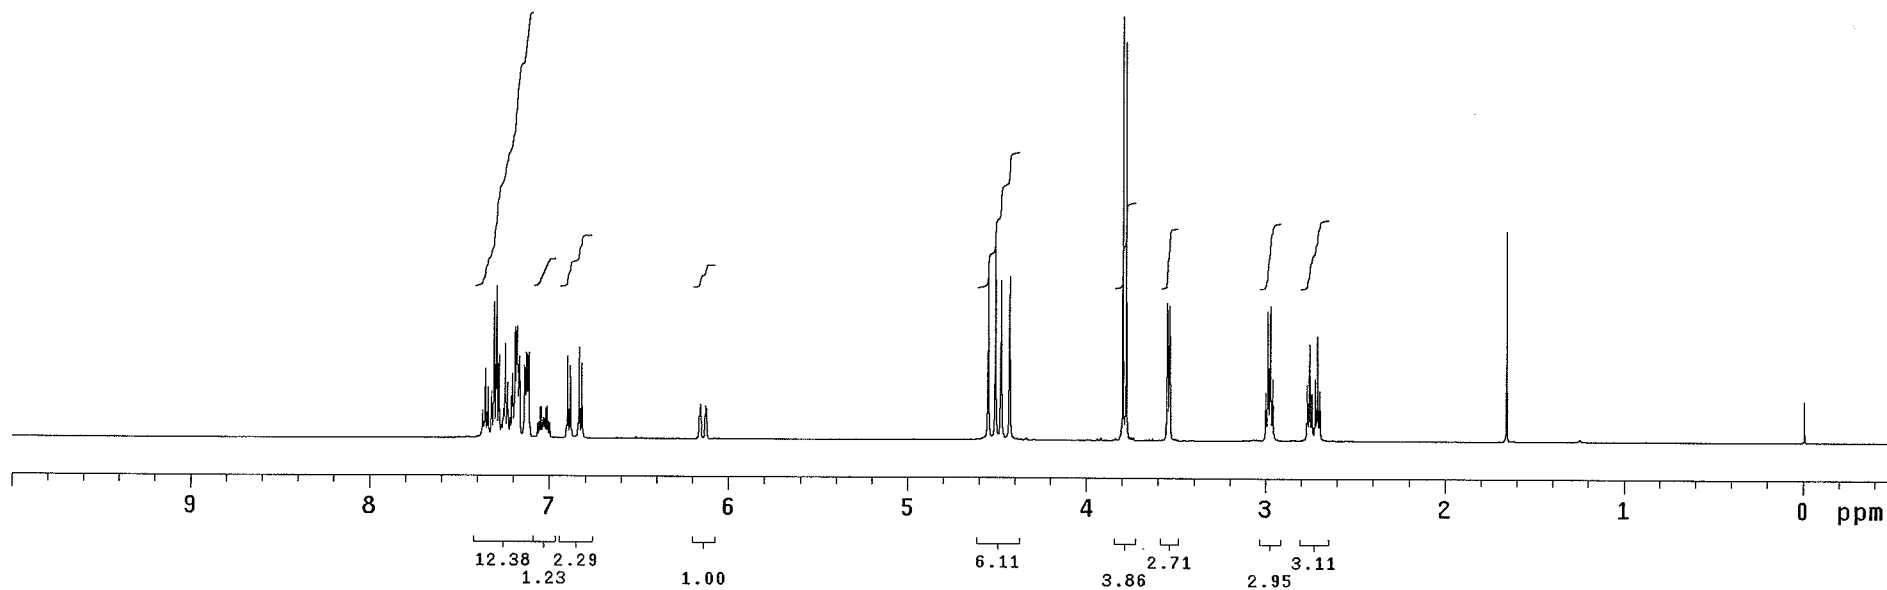

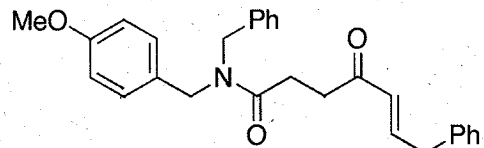

File: 6810-2-13C

Pulse Sequence: s2pu1  
Solvent: CDC13

Temp. 23.0 C / 296.1 K  
User: 1-14-87

Pulse 40.0 degrees  
Acq. time 1.092 sec  
Width 29996.3 Hz  
14388 repetitions  
OBSERVE C13, 125.6284653 MHz  
DECOUPLE H1, 499.6181772 MHz  
Power 34 dB  
continuously on  
WALTZ-16 modulated  
DATA PROCESSING  
Line broadening 1.0 Hz  
FT size 65536  
Total time 305 hr, 55 min

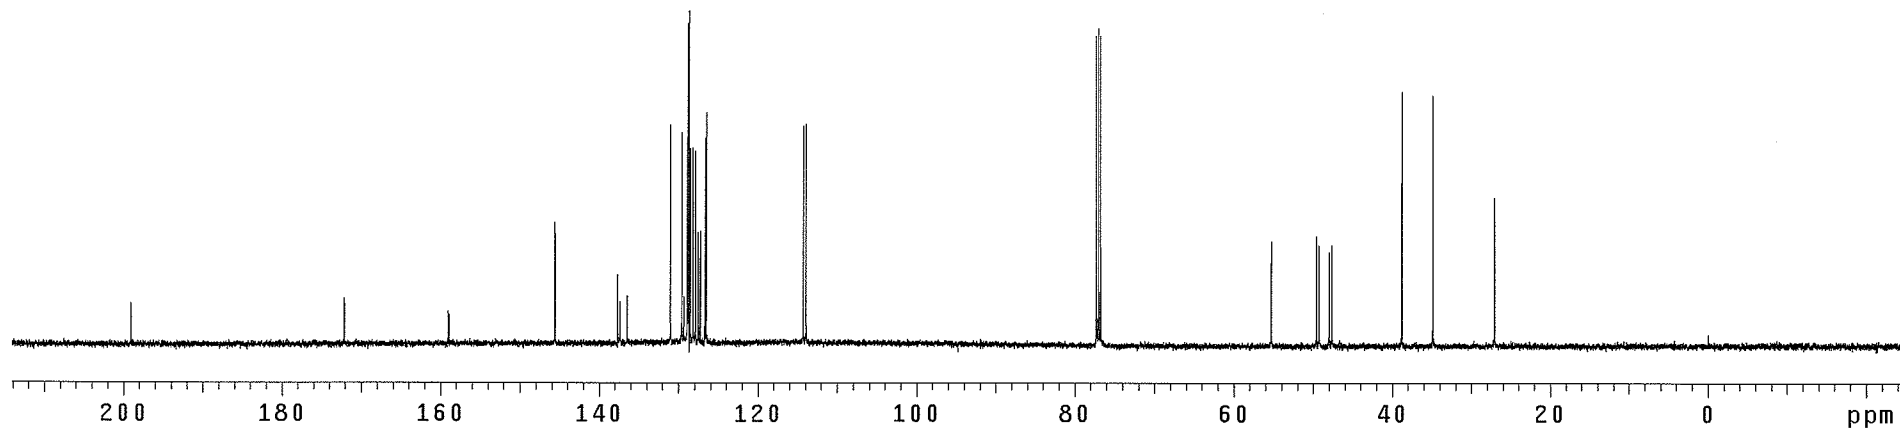

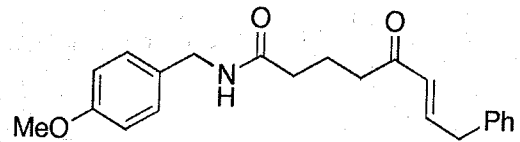

Relax. delay 0.200 sec  
 Pulse 79.4 degrees  
 Acq. time 2.048 sec  
 Width 8000.0 Hz  
 16 repetitions  
 OBSERVE H1, 499.6156713 MHz  
 DATA PROCESSING  
 Line broadening 0.1 Hz  
 FT size 32768  
 Total time 0 min, 40 sec

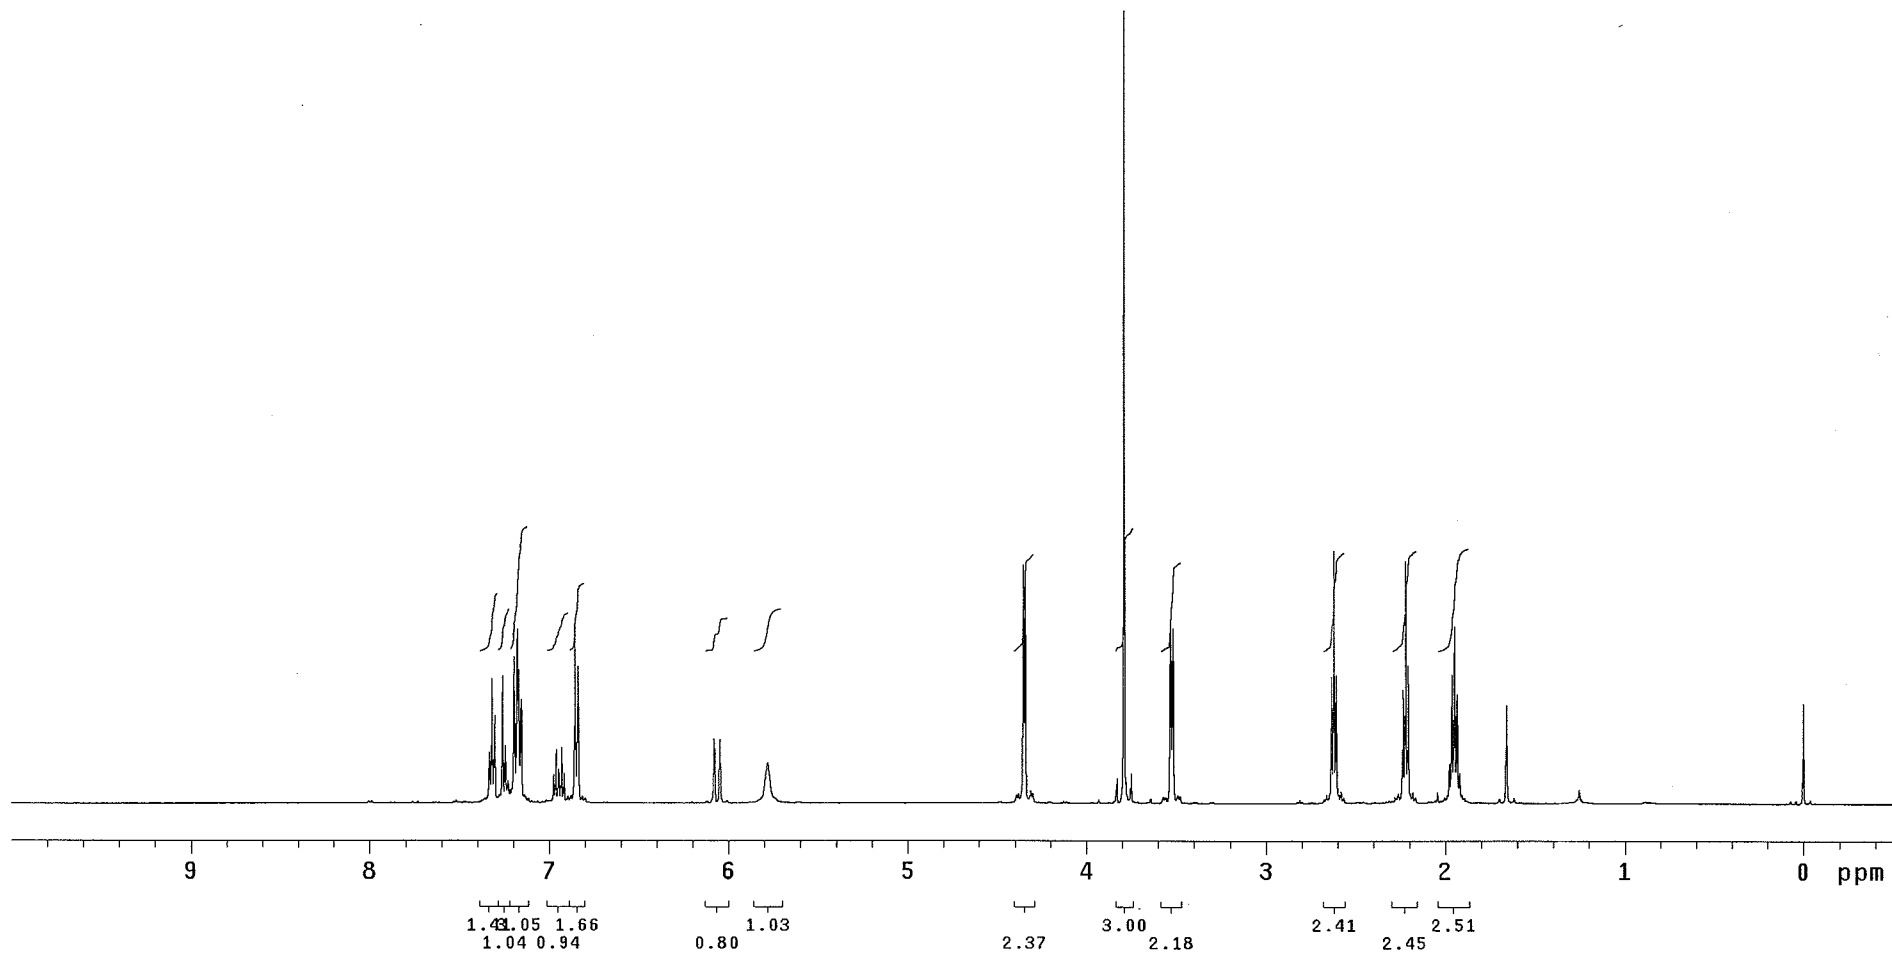

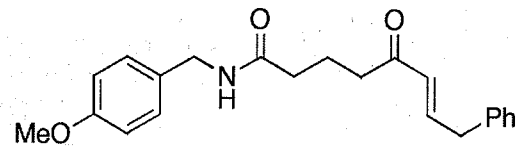

Pulse 40.0 degrees  
Acq. time 1.092 sec  
Width 29996.3 Hz  
4560 repetitions  
OBSERVE C13, 125.6284698 MHz  
DECUPLE H1, 499.6181772 MHz  
Power 34 dB  
continuously on  
WALTZ-16 modulated  
DATA PROCESSING  
Line broadening 1.0 Hz  
FT size 65536  
Total time 30 hr, 35 min, 30 sec

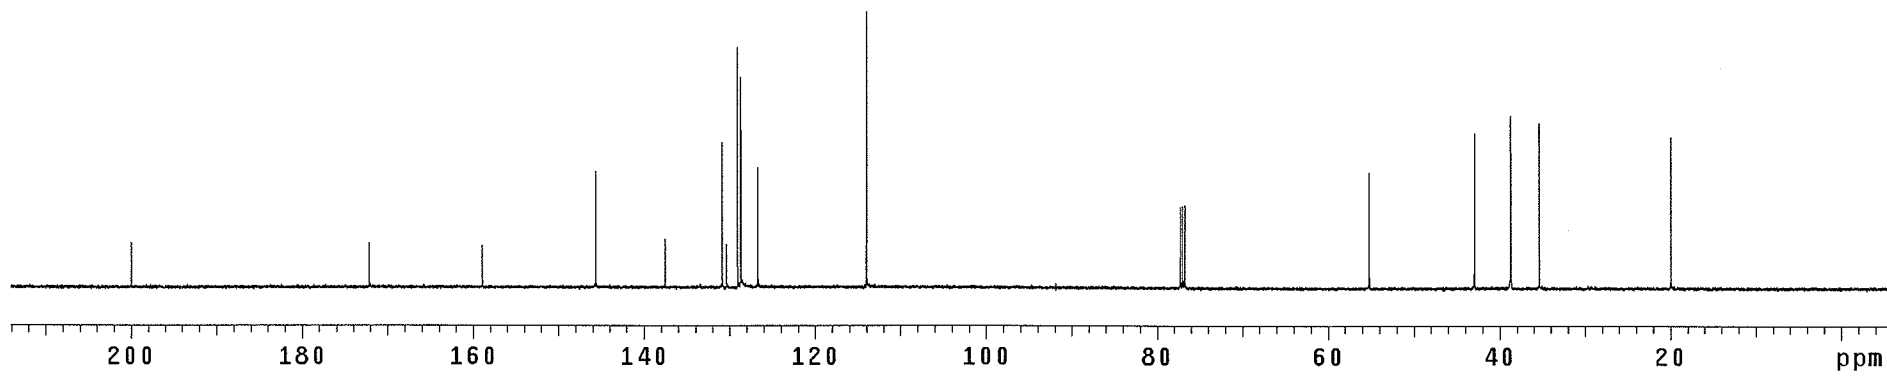



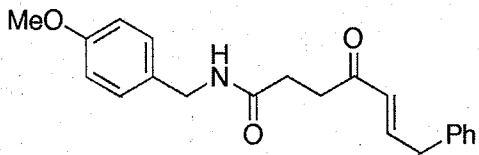

Relax. delay 0.200 sec  
 Pulse 79.4 degrees  
 Acq. time 2.048 sec  
 Width 8000.0 Hz  
 16 repetitions  
 OBSERVE H1, 499.6156718 MHz  
 DATA PROCESSING  
 Line broadening 0.1 Hz  
 FT size 32768  
 Total time 0 min, 40 sec

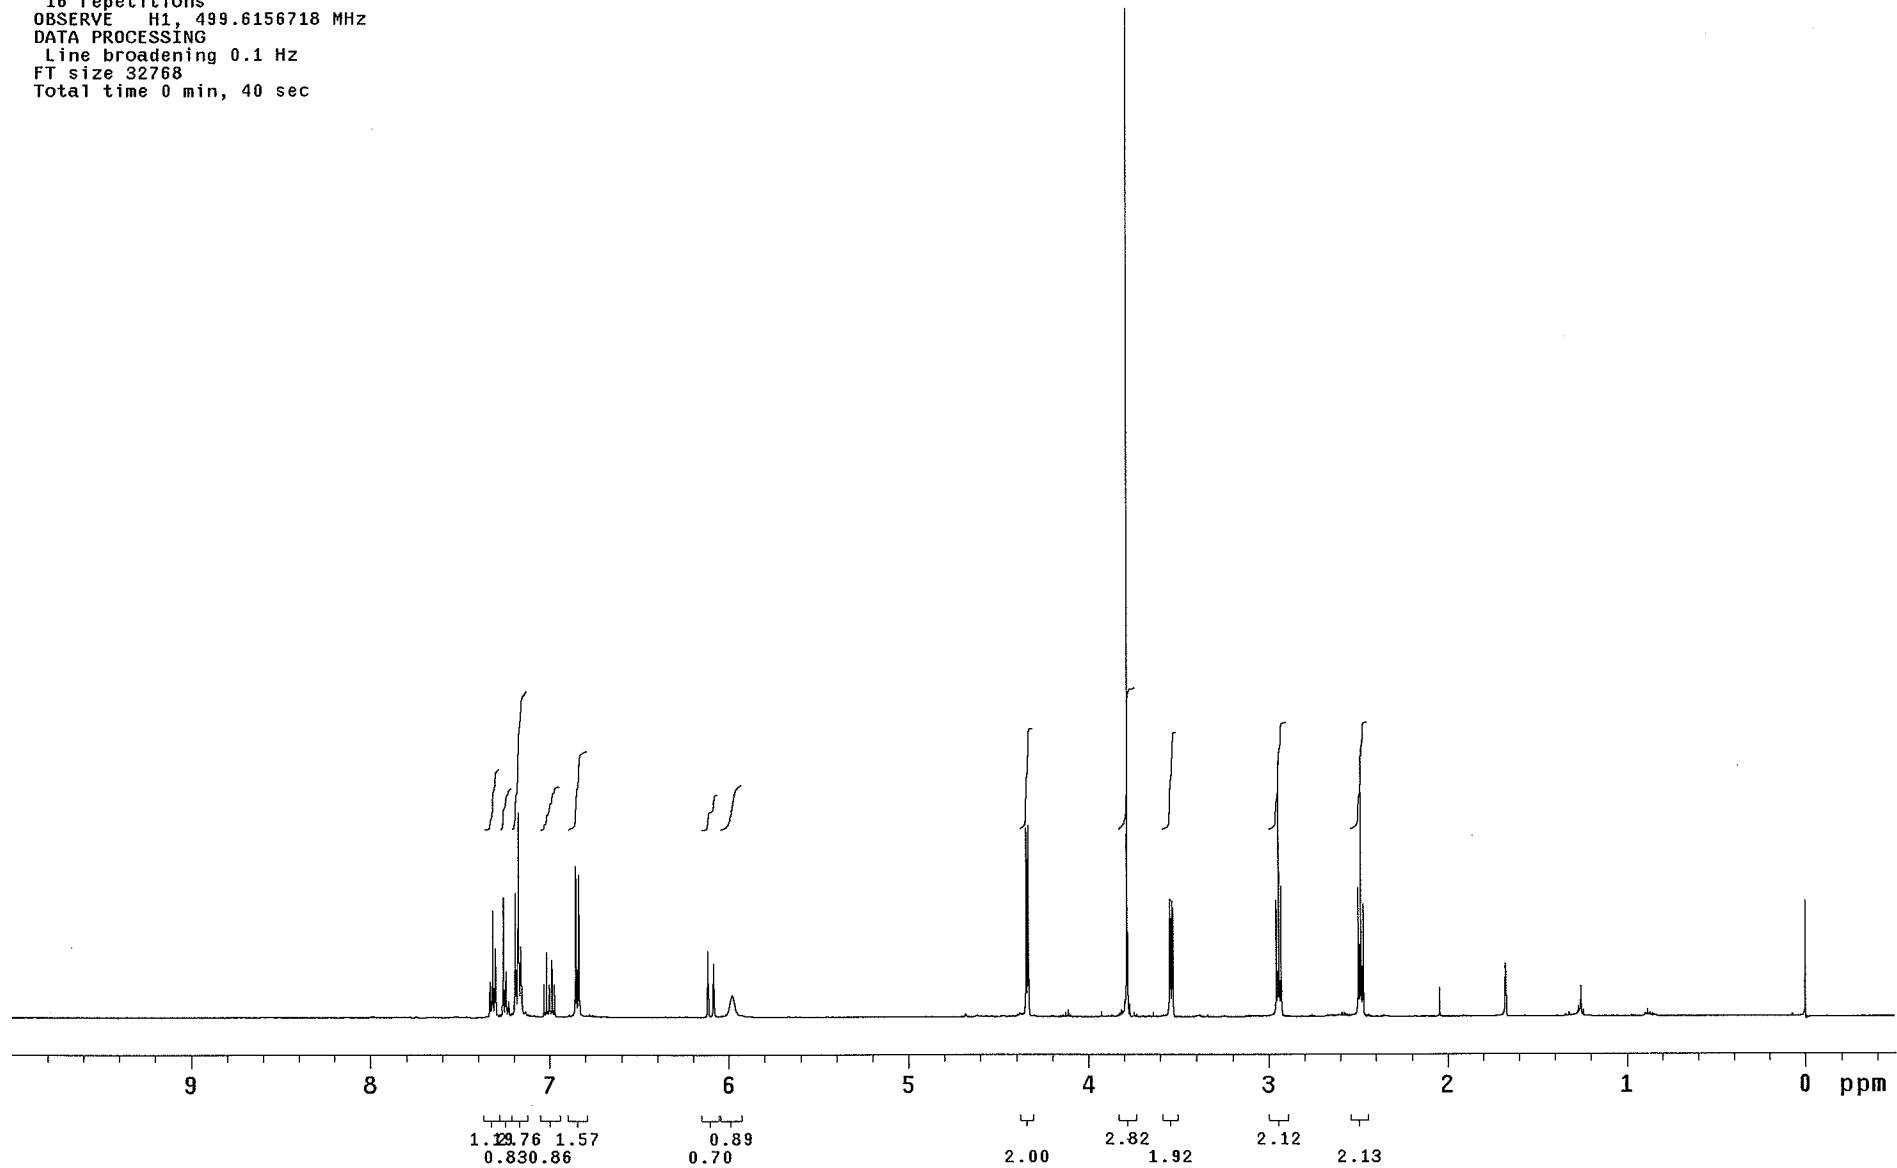

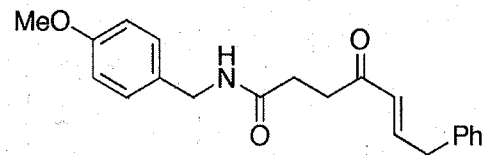

Pulse 40.0 degrees  
Acq. time 1.092 sec  
Width 29996.3 Hz  
3682 repetitions  
OBSERVE C13, 125.6284653 MHz  
DECOUPLE H1, 499.6181772 MHz  
Power 34 dB  
continuously on  
WALTZ-16 modulated  
DATA PROCESSING  
Line broadening 1.0 Hz  
FT size 65536  
Total time 30 hr, 35 min, 30 sec

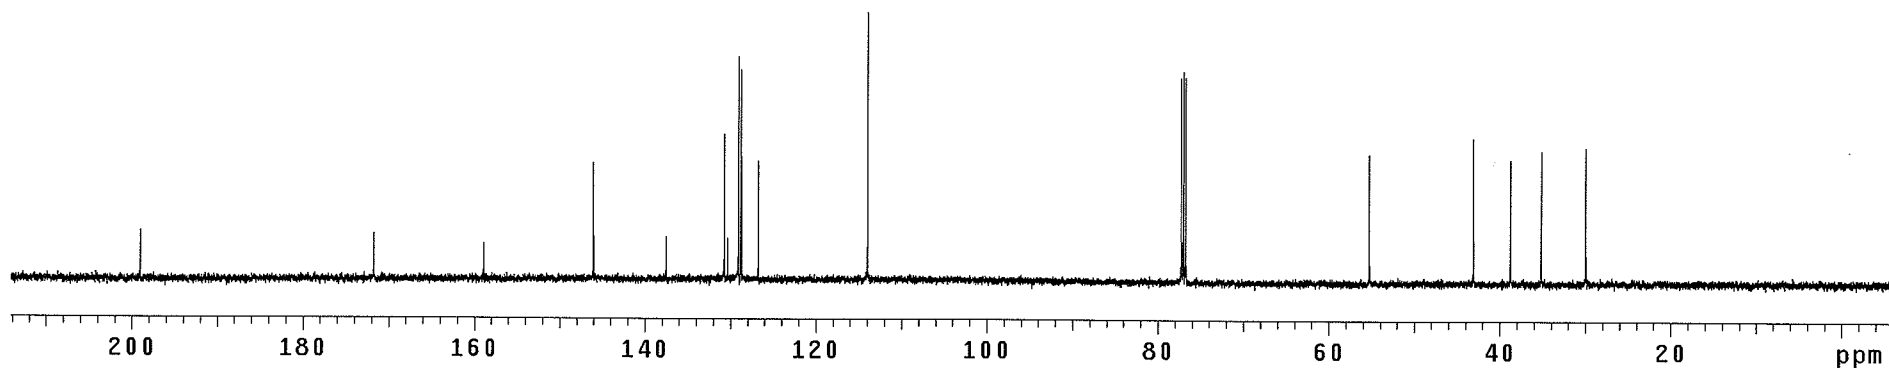

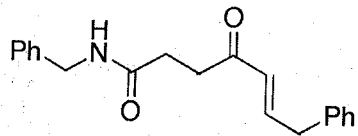

INOVA-500 "Inova500"

Relax. delay 0.200 sec  
Pulse 79.4 degrees  
Acq. time 2.048 sec  
Width 8000.0 Hz  
16 repetitions  
OBSERVE H1, 499.6156718 MHz  
DATA PROCESSING  
Line broadening 0.1 Hz  
FT size 32768  
Total time 0 min, 40 sec

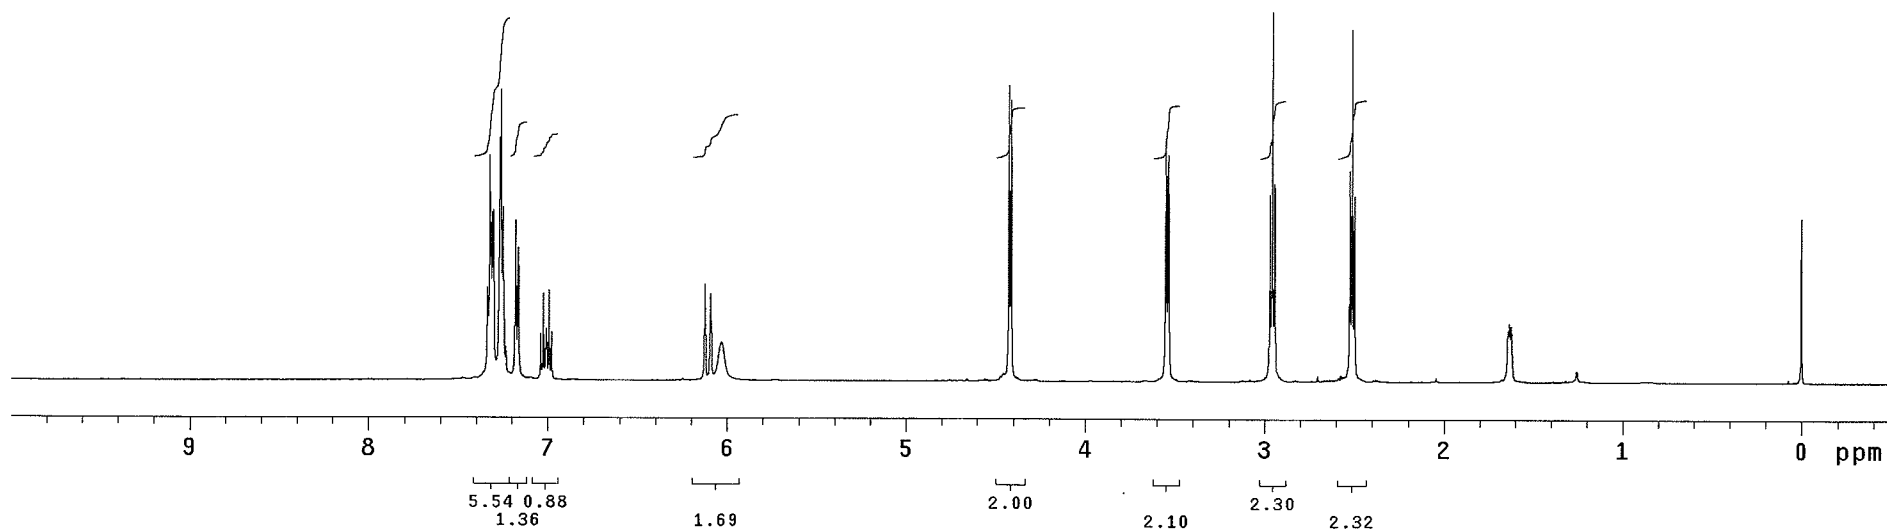

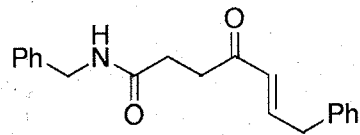

User: 1-14-87  
INOVA-500 "inova500"

Pulse 40.0 degrees  
Acq. time 1.092 sec  
Width 29996.3 Hz  
4900 repetitions  
OBSERVE C13, 125.6284653 MHz  
DECOUPLE H1, 499.6181772 MHz  
Power 34 dB  
continuously on  
WALTZ-16 modulated  
DATA PROCESSING  
Line broadening 1.0 Hz  
FT size 65536  
Total time 30 hr, 35 min, 30 sec

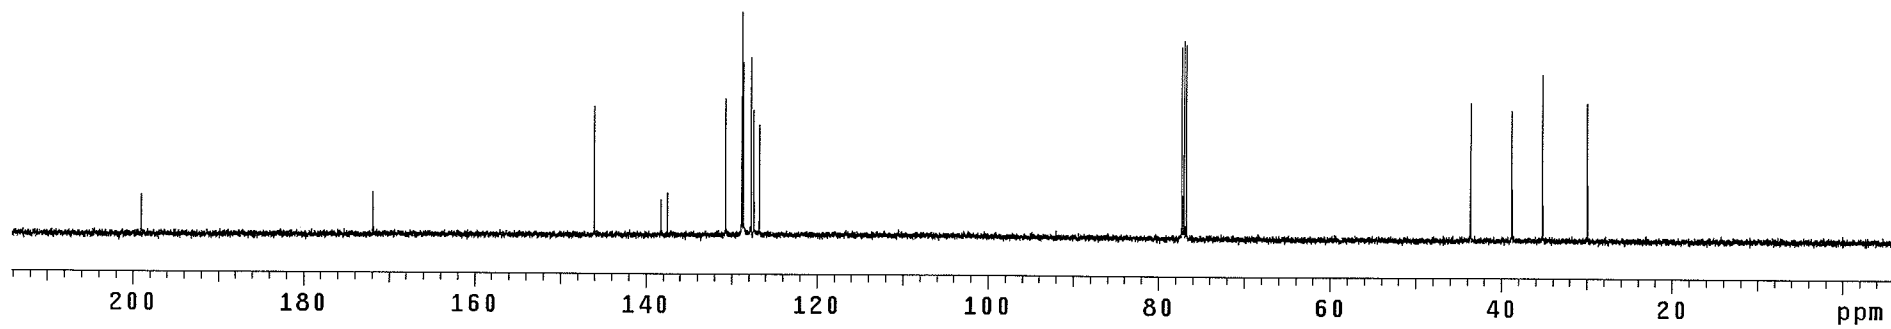

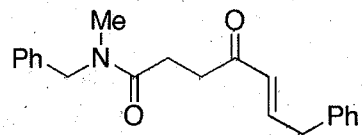

Relax. delay 0.200 sec  
Pulse 79.4 degrees  
Acq. time 2.048 sec  
Width 8000.0 Hz  
16 repetitions  
OBSERVE H1, 499.6156728 MHz  
DATA PROCESSING  
Line broadening 0.1 Hz  
FT size 32768  
Total time 0 min, 40 sec

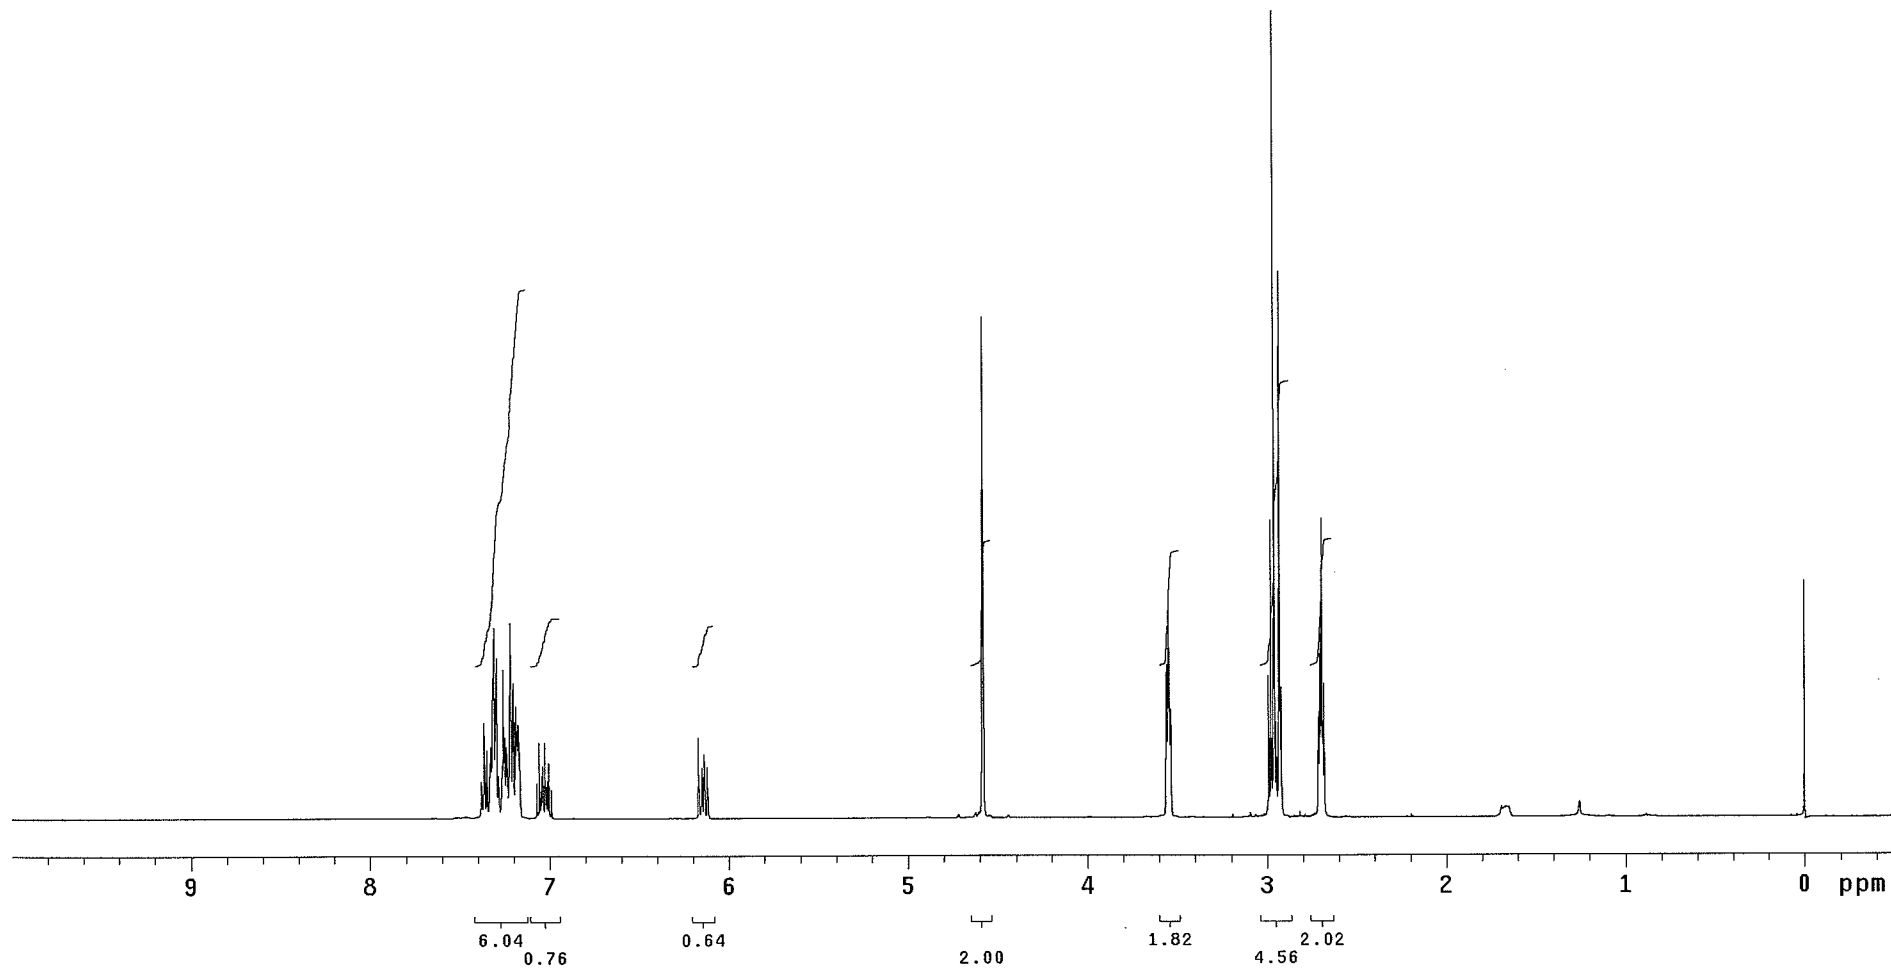

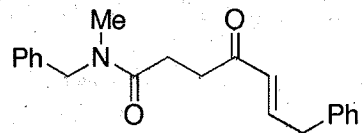

INOVA-500 "inova500"

Pulse 40.0 degrees  
Acq. time 1.092 sec  
Width 29996.3 Hz  
4524 repetitions  
OBSERVE C13, 125.6284653 MHz  
DECOUPLE H1, 499.6181772 MHz  
Power 34 dB  
continuously on  
WALTZ-16 modulated  
DATA PROCESSING  
Line broadening 1.0 Hz  
FT size 65536  
Total time 3059 hr, 11 min, 32 sec

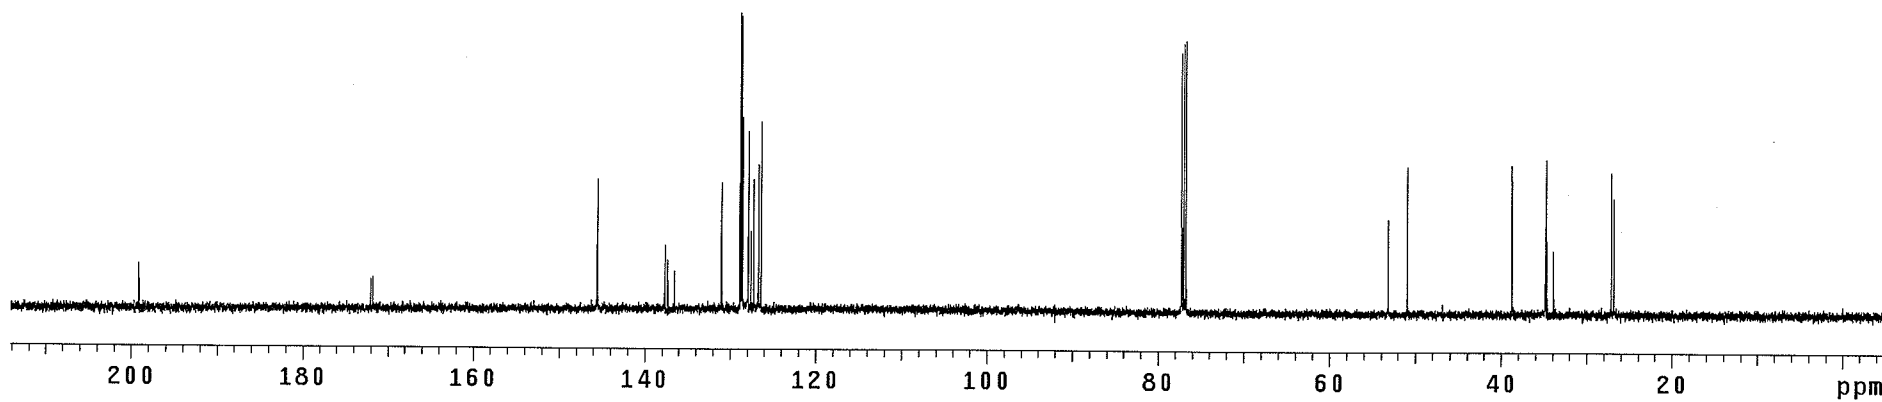

Supplement: NIHMS61900-supplement-si20070118_052.pdf [file NIHMS61900-supplement-si20070118_052.pdf]
